## 1 **Elevated plasma ceramide levels in post-menopausal women**

2  
3 Valentina Vozella<sup>1#</sup>, Abdul Basit<sup>1#</sup>, Fabrizio Piras<sup>2</sup>, Natalia Realini<sup>1</sup>, Andrea Armirotti<sup>1</sup>, Paola Bossù<sup>3</sup>,  
4 Francesca Assogna<sup>2</sup>, Stefano L. Sensi<sup>4</sup>, Gianfranco Spalletta<sup>2, 5</sup>, Daniele Piomelli<sup>6\*</sup>

5  
6 <sup>1</sup>Department of Drug Discovery and Development, Istituto Italiano di Tecnologia, Via Morego 30,  
7 16163 Genova, Italy.

8 <sup>2</sup>Department of Clinical and Behavioral Neurology, Laboratory of Neuropsychiatry, IRCCS Santa  
9 Lucia Foundation, via Ardeatina 306, 00179 Rome, Italy.

10 <sup>3</sup>Department of Clinical and Behavioral Neurology, Laboratory of Experimental Neuropsychobiology,  
11 IRCCS Santa Lucia Foundation, via Ardeatina 306, 00179 Rome, Italy.

12 <sup>4</sup>Department of Neurosciences, Imaging and Clinical Sciences, "G. d'Annunzio" University of Chieti-  
13 Pescara, Via dei Vestini 33, 66100 Chieti, Italy; Molecular Neurology Unit, Center of Excellence on  
14 Aging and Translational Medicine (Ce.S.I.-Me.T.), "G. d'Annunzio" University of Chieti-Pescara,  
15 66100 Chieti, Italy; Departments of Neurology and Pharmacology, Institute for Mind Impairments and  
16 Neurological Disorders, University of California, Irvine, California 92697, United States.

17 <sup>5</sup>Menninger Department of Psychiatry and Behavioral Sciences, Baylor College of Medicine, Houston,  
18 TX, United States.

19 <sup>6</sup>Departments of Anatomy and Neurobiology, Biochemistry and Pharmacology, University of  
20 California, Irvine, California 92697, United States.

21 # Equal contribution.

22 \* To whom correspondence should be addressed: Daniele Piomelli, Department of Anatomy and  
23 Neurobiology, 3216 Gillespie NRF, University of California, Irvine, CA, 92697-4625 USA. Phone:  
24 (949) 824-6180; Fax: (949) 824-6305; e-mail: [piomelli@uci.edu](mailto:piomelli@uci.edu)

25 **ABSTRACT**

26 Circulating ceramide levels are abnormally elevated in age-dependent pathologies such as  
27 cardiovascular diseases, obesity and Alzheimer's disease. Nevertheless, the potential impact of age on  
28 plasma ceramide levels has not yet been systematically examined. In the present study, we quantified a  
29 focused panel of plasma ceramides and dihydroceramides in a cohort of 164 subjects (84 women) 19 to  
30 80 years of age. After adjusting for potential confounders, multivariable linear regression analysis  
31 revealed a positive association between age and ceramide (d18:1/24:0) ( $\beta$  (SE) = 5.67 (2.38);  $p$  =  
32 .0198) and ceramide (d18:1/24:1) ( $\beta$  (SE) = 2.88 (.61);  $p$  < .001) in women, and between age and  
33 ceramide (d18:1/24:1) in men ( $\beta$  (SE) = 1.86 (.77);  $p$  = .0179). In women of all ages, but not men,  
34 plasma ceramide (d18:1/24:1) was negatively correlated with plasma estradiol ( $r$  = -0.294;  $p$  = .007).  
35 Finally, *in vitro* experiments in human cancer cells expressing estrogen receptors showed that  
36 incubation with estradiol (10 nM, 24 h) significantly decreased ceramide accumulation. Together, the  
37 results suggest that aging is associated with an increase in circulating ceramide levels, which in post-  
38 menopausal women may be at least partially dependent on lower estradiol levels.

## 40 INTRODUCTION

41 The ceramides are key lipid constituents of mammalian cells. They regulate the structural properties of  
42 the lipid bilayer [1] along with its interaction with cellular proteins [2], and control many signalling  
43 processes, including cell survival [3], growth and proliferation [4], differentiation [5], senescence [6]  
44 and apoptosis [7,8]. Dysfunctions in ceramide-mediated signalling may contribute to the initiation and  
45 progression of a variety of age-dependent diseases. Human studies have shown the existence of  
46 abnormal plasma levels of various ceramide species – including ceramide (d18:1/18:0), (d18:1/22:0),  
47 (d18:1/24:0) and (d18:1/24:1) – in several conditions such as obesity [9], type-2 diabetes [10],  
48 hypertension [11], atherosclerosis [12] and other cardiovascular diseases [13]. Furthermore, elevated  
49 serum levels of long-chain ceramides have been linked to the increased risk of memory deficits [14]  
50 and may be predictive of hippocampal volume loss and cognitive decline in patients affected by Mild  
51 Cognitive Impairment [15]. Other studies have reported the existence of sex-dependent differences in  
52 circulating ceramides, albeit with apparently contrasting results [16-18]. For example, in a study of a  
53 large cohort of Mexican-Americans of median age 35.7 years, plasma ceramides were found to be  
54 higher in men than in women [17]. By contrast, in the Baltimore Longitudinal Study of Aging, whose  
55 participants were aged 55 or older, plasma ceramide concentrations were shown to be higher in women  
56 than in men [18].

57 Aging in rats and mice is associated with sexually dimorphic changes in the sphingolipid composition  
58 of several brain structures, including the hippocampus [19]. Age-dependent sphingolipid alterations  
59 have also been documented in peripheral rodent tissues [20]. In the present study, we hypothesized that  
60 aging in humans might be similarly associated with changes in ceramide levels. To test this idea, we  
61 profiled six ceramide and dihydroceramide species in lipid extracts of plasma from 164 subjects (84  
62 women) of age 19 to 80 years, using liquid chromatography/mass spectrometry (LC-MS/MS). A

63 primary criterion for subject selection was the absence of major medical illnesses and, particularly, of  
64 conditions that had been previously linked to ceramide alterations.

## 65 MATERIALS AND METHODS

### 66 Study subjects

67 We recruited 164 Italian subjects (84 women) from 19 to 80 years of age (Table 1). There were no  
68 significant differences between male and female subjects with regard to age, years of education, ethnic  
69 background, cognitive status, as assessed by the Mini-Mental State Examination (MMSE), obesity and  
70 diabetes, hypertension and use of anti-hypercholesterolemic drugs. By contrast, there was difference in  
71 smoking status (20.23% women versus 7.5% men). Moreover, 6 of 44 pre-menopause women used  
72 contraceptives at time of enrollment. None of the post-menopause women was under hormone  
73 replacement therapy (HRT).

74 **Table 1.** Sociodemographic and clinical characteristics of men and women included in the study.

|                        | Whole sample<br>(n=164) | Men<br>(n=80)           | Women<br>(n=84)         | <i>p</i> -value |
|------------------------|-------------------------|-------------------------|-------------------------|-----------------|
| Characteristic         |                         |                         |                         |                 |
| Age<br>(years)         | 49.3±16.6 (range 19-80) | 49.6±16.8 (range 19-80) | 49.0±16.6 (range 20-78) | .46             |
| Education<br>(years)   | 14.4±3.8 (range 5-25)   | 14.6±4.0 (range 5-25)   | 14.2±3.7 (range 5-24)   | .85             |
| MMSE                   | 29.4±1.0 (range 26-30)  | 29.4±1.0 (range 26-30)  | 29.4±1.0 (range 26-30)  | .82             |
| Ethnicity<br>(% white) | 100.00                  | 100.00                  | 100.00                  |                 |
| Obesity<br>(%)         | 0.00                    | 0.00                    | 0.00                    |                 |

|                 |       |       |       |      |
|-----------------|-------|-------|-------|------|
| Diabetes        | 0.00  | 0.00  | 0.00  |      |
| (%)             |       |       |       |      |
| Current smokers | 14.02 | 7.50  | 20.23 | .02  |
| (%)             |       |       |       |      |
| Former smokers  | 17.07 | 21.25 | 13.10 | .21  |
| (%)             |       |       |       |      |
| Hypertension    | 19.51 | 20.00 | 19.05 | 1.00 |
| (%)             |       |       |       |      |
| AHT             | 7.32  | 11.25 | 3.57  | .07  |
| (%)             |       |       |       |      |
| Contraceptives  | 3.66  | 0.00  | 7.14  | .03  |
| (%)             |       |       |       |      |

75 *Notes.* MMSE: Mini Mental State Examination. AHT: Anti-hypercholesterolemic therapy. Data are  
76 expressed as mean  $\pm$  standard deviation (SD) or as %. Differences between groups are considered  
77 statistically significant at  $p < .05$ ; unpaired Student's  $t$ -test for continuous variables; Fisher's exact test  
78 for categorical variables.

79

80 Exclusion criteria were: (i) suspicion of cognitive impairment or dementia based on MMSE [21] (score  
81  $\leq 26$ , consistent with normative data collected in the Italian population) and confirmed by a detailed  
82 neuropsychological evaluation using the Mental Deterioration Battery [22] and clinical criteria for  
83 Alzheimer's dementia [23] or Mild Cognitive Impairment [24]; (ii) subjective complaints of memory  
84 difficulties or other cognitive deficits, regardless of whether or not these interfered with daily life; (iii)  
85 vision and hearing loss that could potentially influence testing results; (iv) major medical illnesses (i.e.,  
86 unstable diabetes; obesity; obstructive pulmonary disease or asthma; hematological and oncological

87 disorders; pernicious anemia; significant gastrointestinal, renal, hepatic, endocrine, or cardiovascular  
88 system diseases; recently treated hypothyroidism); (v) current or reported psychiatric disease, as  
89 assessed by the Structured Clinical Interview for Diagnostic and Statistical Manual of Mental  
90 Disorders, 4th Edition, Text Revision (DSM-IV-TR SCID) [25] or neurological disease, as assessed by  
91 clinical evaluation; and (vi) known or suspected history of alcoholism or drug addiction. Finally,  
92 because ceramides have been previously involved in the pathogenesis of neurodegenerative disorders  
93 [15,26,27], we excluded subjects who showed brain abnormalities or vascular lesions as determined by  
94 using a recently published semi-automated method [28]. The menopausal status was prospectively  
95 assessed during clinical interviews. Women were defined as post-menopausal when showing 12  
96 consecutive months of amenorrhea that was not due to other obvious pathological or physiological  
97 causes.

98 Blood collection and analyses were approved by the Santa Lucia Foundation Ethics Committee and  
99 complied with the ethical principles set out in the Declaration of Helsinki. A written consent form was  
100 signed by all participants after they received a full explanation of the study procedures.

#### 101 **Variables examined in relation to ceramide levels.**

102 All variables were assessed for each patient using the same methods. Demographic variables  
103 considered in linear regression analysis included age and sex. Medical history covariates included  
104 hypertension, use of anti-hypercholesterolemic agents and use of contraceptives. Current and former  
105 smoking status was ascertained by an oral interview.

#### 106 **Chemicals**

107 Solvents and chemicals were purchased from Sigma Aldrich (Milan, Italy). Ceramide standards were  
108 from Avanti Polar Lipids (Alabaster, AL, USA).

#### 109 **Blood collection**

110 Blood was drawn by venipuncture in the morning after an overnight fast, and collected into 10-ml tubes  
111 containing spray-coated EDTA (EDTA Vacutainer, BD Biosciences, San Diego, CA, USA). Plasma  
112 was obtained by blood centrifugation at  $400 \times g$  at  $4\text{ }^{\circ}\text{C}$  for 15 min. The plasma divided into aliquots  
113 was stored at  $-80\text{ }^{\circ}\text{C}$  until analyses.

#### 114 **Lipid extraction**

115 Lipids were extracted using a modified Bligh and Dyer method [29]. Briefly, plasma samples (50  $\mu\text{L}$ )  
116 or cell pellets were transferred to glass vials and liquid-liquid extraction was carried out using 2 mL of  
117 a methanol/chloroform mixture (2:1 vol/vol) containing the odd-chain saturated ceramide (d18:1/17:0)  
118 as an internal standard. After mixing for 30 s, lipids were extracted with chloroform (0.5 mL), and  
119 extracts were washed with liquid chromatography-grade water (0.5 mL), mixing after each addition.  
120 The samples were centrifuged for 15 min at  $3500 \times g$  at room temperature. After centrifugation, the  
121 organic phases were collected and transferred to a new set of glass vials. To increase overall recovery,  
122 the aqueous fractions were extracted again with chloroform (1 mL). The two organic phases were  
123 pooled, dried under a stream of  $\text{N}_2$  and residues were dissolved in methanol/chloroform (9:1 vol/vol,  
124 0.07 mL). After mixing (30 s) and centrifugation (10 min,  $5000 \times g$ , room temperature) the samples  
125 were transferred to glass vials for analyses.

#### 126 **Ceramide quantification**

127 Ceramides were analyzed by LC-MS/MS using an Acquity® ultra-performance liquid chromatography  
128 (UPLC) system coupled to a Xevo triple quadrupole mass spectrometer interfaced with electrospray  
129 ionization (Waters, Milford, MA, USA), as previously described [29]. Lipids were separated on a  
130 Waters Acquity® BEH C18 column ( $2.1 \times 50\text{ mm}$ ,  $1.7\text{ }\mu\text{m}$  particle size) at  $60\text{ }^{\circ}\text{C}$  and eluted at a flow  
131 rate of 0.4 mL/min. The mobile phase consisted of 0.1% formic acid in acetonitrile/water (20:80  
132 vol/vol) as solvent A and 0.1% formic acid in acetonitrile/isopropanol (20:80 vol/vol) as solvent B. A  
133 gradient program was used: 0.0–1.0 min 30% B, 1.0–2.5 min 30 to 70% B, 2.5–4.0 min 70 to 80% B,



134 4.0–5.0 min 80% B, 5.0–6.5 min 80 to 90% B, and 6.6–7.5 min 100% B. The column was  
135 reconditioned to 30% B for 1.4 min. The injection volume was 3  $\mu$ L. Detection was done in the  
136 positive electrospray ionization mode. Capillary voltage was 3.5 kV and cone voltage was 25 V. The  
137 source and desolvation temperatures were set at 120 °C and 600 °C respectively. Desolvation gas and  
138 cone gas (N<sub>2</sub>) flow were 800 L/h and 20 L/h, respectively. Plasma and cell-derived ceramides were  
139 identified by comparison of their LC retention times and MS/MS fragmentation patterns with those of  
140 authentic standards (Avanti Polar Lipids). Extracted ion chromatograms were used to identify and  
141 quantify the following ceramides and dihydroceramides (d18:1/16:0) ( $m/z$  520.3 > 264.3), (d18:1/18:0)  
142 ( $m/z$  = 548.3 > 264.3), (d18:1/24:0) ( $m/z$  = 632.3 > 264.3), (d18:1/24:1) ( $m/z$  = 630.3 > 264.3),  
143 (d18:0/24:0) ( $m/z$  = 652.5 > 634.5) and (d18:0/24:1) ( $m/z$  = 650.5 > 632.5). Data were acquired by the  
144 MassLynx software and quantified using the TargetLynx software (Waters, Milford, MA, USA).

#### 145 **Estradiol quantification**

146 Plasma 17- $\beta$ -estradiol (E2) levels were quantified using a competitive binding immunoassay kit  
147 (Human E2 ELISA kit, Invitrogen, Milan, Italy) following manufacturer's instructions. Briefly, plasma  
148 samples, controls and standard curve samples (50  $\mu$ L) were incubated with E2-horseradish peroxidase  
149 conjugate (50  $\mu$ L) and anti-estradiol antibody (50  $\mu$ L) in a 96-well plate for 2 h, at room temperature,  
150 on a shaker set at 700  $\pm$  100 rpm. Washing was carried out by completely aspirating the liquid, filling  
151 the wells with diluted wash buffer (0.4 mL) provided in the kit and then aspirating again. After  
152 repeating this procedure 4 times, chromogen solution (200  $\mu$ L) was added to each well; reactions were  
153 run for 15 min and stopped adding 50  $\mu$ L of the stop solution provided in the kit. Absorbance was  
154 measured at 450 nm and estradiol concentrations were calculated by interpolation from the reference  
155 curve.

#### 156 **Cell cultures and treatment**

157 The MCF7 human breast cancer cell line [30,31] was a kind gift of Dr. Gennaro Colella (Mario Negri  
158 Institute, Milan, Italy). Cells were cultured in phenol red-free Dulbecco's Modified Eagle's Medium  
159 (DMEM) (Gibco by Life Technologies, Carlsbad, CA, USA) supplemented with charcoal-stripped fetal  
160 bovine serum (10%) (Sigma Aldrich, Milan, Italy) to starve cells from steroid hormones (starvation  
161 medium), L-glutamine (2 mM), and penicillin/streptomycin (100 µg/mL), in a humidified atmosphere  
162 (5% CO<sub>2</sub>, 37 °C). Cells were seeded in 6-well plates (3 x 10<sup>5</sup> cells/well) and cultured for 24 h. Estradiol  
163 (Sigma Aldrich, Milan, Italy) was dissolved in dimethyl sulfoxide (DMSO) and diluted in phenol red-  
164 free DMEM to a final concentration of 10 nM (0.1% final DMSO concentration). After 24 h  
165 incubation, the media were removed, cells were washed with phosphate-buffered saline, scraped and  
166 centrifuged (800 x g, 4 °C, 10 min). Protein concentrations were measured using the bicinchoninic  
167 acid assay (Pierce, Rockford, IL, USA) and cell pellets were stored at -80 °C until analyses.

#### 168 **Statistical analyses**

169 Results are expressed as mean ± SEM (standard error of the mean). Sex differences in baseline  
170 demographic and health-related characteristics were examined using Fisher's exact test for categorical  
171 variables and unpaired Student's *t*-test for continuous variables. Data were analyzed by unpaired  
172 Student's *t*-test or 2-way ANOVA followed by Bonferroni post-hoc test. Pearson's correlation  
173 coefficient assessed the pairwise correlation between estradiol and ceramide levels. Significant outliers  
174 were excluded using the Grubbs' test. Multivariable linear regression method was used to assess the  
175 association between ceramides and patients' characteristics. Differences between groups were  
176 considered statistically significant at values of  $p < .05$ . The GraphPad Prism software (GraphPad  
177 Software, Inc., La Jolla, CA, USA) and SAS 9.4 (SAS Institute, Cary, NC, USA) were used for  
178 statistical analyses.

179

## 180 RESULTS

### 181 Plasma ceramide levels are positively correlated with age

182 The scatter plot reported in Fig 1A illustrates the total ceramide levels in plasma of individual women  
183 aged 20-78 years. Pearson's analysis of the data revealed a statistically significant positive correlation  
184 between ceramide levels and age ( $r = 0.378$ ;  $p = .0004$ ). Because the largest accrual in plasma  
185 ceramides occurred between the age of 40 and 50 years, which is coincident with menopause, in a  
186 secondary analysis we grouped the data according to the subjects' menopausal status. We found a  
187 statistically detectable difference between pre-menopausal women (20-54 years) and post-menopausal  
188 women (47-78 years) (Fig 1B). In particular, the levels of long-chain ceramide (d18:1/18:0) ( $p = .0035$ ,  
189 unpaired Student's *t*-test), very long-chain ceramides (d18:1/24:0) ( $p = .0012$ ) and (d18:1/24:1) ( $p <$   
190  $.0001$ ), and dihydroceramide (d18:0/24:1) ( $p = .0340$ ) were higher in post-menopausal relative to pre-  
191 menopausal women (Fig 1B).

192

193 **Fig 1.** Scatter plot of plasma ceramide concentrations in women aged 20 to 78 years.

194 (A) Total ceramide levels in 84 female subjects included in the study. Pearson's correlation is  
195 considered statistically significant at  $p < .05$ . (B) Average levels of individual ceramide species in pre-  
196 menopausal women (20-54 years,  $n = 44$ , open bars) and post-menopausal women (47-78 years,  $n = 40$ ,  
197 closed bars). Results are expressed as mean  $\pm$  SEM. \* $p < .05$ , \*\* $p < .01$ , \*\*\* $p < .001$ ; unpaired  
198 Student's *t*-test.

199

200 No differences were found in the levels of ceramide (d18:1/16:0) ( $p = .3526$ ) and dihydroceramide  
201 (d18:0/24:0) ( $p = .3633$ ). In contrast with these findings in women, men showed no significant age-  
202 dependent increases in plasma ceramides ( $r = 0.143$ ;  $p = .208$ ) (Fig 2A). Male subjects in the age  
203 groups 19-54 and 55-80 years displayed comparable levels of circulating ceramide (d18:1/18:0) ( $p =$

204 .7112), (d18:1/24:0) ( $p = .7895$ ), (d18:1/24:1) ( $p = .0847$ ) and dihydroceramide (d18:0/24:1) ( $p =$   
205 .9014). However, dihydroceramide (d18:0/24:0) was significantly lower in men >55 years, compared to  
206 younger men ( $p = .0003$ ) (Fig 2B).

207

208 **Fig 2.** Scatter plot of plasma ceramide concentrations in men aged 19 to 80 years.

209 (A) Total ceramide levels in 80 male subjects included in the study. Pearson's correlation is considered  
210 statistically significant at  $p < .05$ . (B) Average levels of individual ceramide species in men aged 19-54  
211 years ( $n = 48$ , open bars) and 55-80 years ( $n = 32$ , closed bars). Results are expressed as mean  $\pm$   
212 SEM. \* $p < .05$ , \*\* $p < .01$ , \*\*\* $p < .001$ ; unpaired Student's  $t$ -test.

213

214 In an additional analysis, we compared total ceramide levels in plasma of pre- and post-menopausal  
215 women with those measured in age-matched men (Fig 3). The results show that pre-menopausal  
216 women had significantly lower levels of circulating ceramides ( $p < .05$ , 2-way ANOVA followed by  
217 Bonferroni post-hoc test) relative to men of the same age (Fig 3A). The difference disappeared after  
218 menopause ( $p > .05$ ) (Fig 3A).

219

220 **Fig 3.** Plasma ceramide and estradiol concentrations in men and women.

221 (A) Plasma ceramide levels in, left, pre-menopausal women (20-54 years,  $n = 44$ ) and age-matched  
222 men (19-54 years,  $n = 48$ ) and, right, post-menopausal women (47-78 years,  $n = 40$ ) and age-matched  
223 men (55-80 years,  $n = 32$ ). (B) Plasma estradiol levels in, left, pre-menopausal women (20-54 years,  $n =$   
224  $44$ ) and age-matched men (19-54 years,  $n = 48$ ) and, right, post-menopausal women (47-78 years,  $n =$   
225  $40$ ) and age-matched men (55-80 years,  $n = 32$ ). \* $p < .05$ , \*\* $p < .01$ , \*\*\* $p < .001$ ; 2-way ANOVA  
226 followed by Bonferroni post-hoc test (women 20-54 years versus men 19-54 years). #  $p < .05$ , ##  $p <$

227 .01, ###  $p < .001$ ; 2-way ANOVA followed by Bonferroni post-hoc test (women 20-54 years versus  
228 women 47-78 years).

### 229 Variables associated with plasma ceramides

230 Next, we used multivariable linear regression models to test the association between age and  
231 ceramides and adjust for potential covariates for which data had been collected (Table 1). These factors  
232 included hypertension (32/164 subjects, 16 women), tobacco smoking (23/164 subjects, 17 women),  
233 use of anti-hypercholesterolemic (12/164 subjects, 3 women) or contraceptive agents (6/164 subjects, 6  
234 women), obesity (0/164 subjects) and diabetes (0/164 subjects). We did not take into account the  
235 number of cigarettes smoked as a variable of multivariable linear regression analysis. The adjusted  
236 linear regression analysis confirmed that ceramide (d18:1/24:0) ( $\beta$  (SE) = 5.67 (2.38);  $p = .0198$ ) and  
237 ceramide (d18:1/24:1) ( $\beta$  (SE) = 2.88 (0.61);  $p < .0001$ ) were positively associated with age in women  
238 and also, unexpectedly, revealed an opposite, albeit weaker, trend with ceramide (d18:1/16:0) ( $\beta$  (SE) =  
239 -.08 (.04);  $p = .0285$ ) (Table 2A).

240

241 **Table 2A.** Multivariable linear regression analysis to assess the association between individual  
242 ceramide species and variables (age, smoke, hypertension, contraceptive use, anti-hypercholesterolemic  
243 therapy) among women.

|            | Ceramide<br>(d18:1/16:0)     |            | Ceramide<br>(d18:1/18:0)     |            | Ceramide<br>(d18:1/24:0)     |            | Ceramide<br>(d18:1/24:1)     |            |
|------------|------------------------------|------------|------------------------------|------------|------------------------------|------------|------------------------------|------------|
|            | $\beta$ -coefficient<br>(SE) | $p$ -value | $\beta$ -coefficient<br>(SE) | $p$ -value | $\beta$ -coefficient<br>(SE) | $p$ -value | $\beta$ -coefficient<br>(SE) | $p$ -value |
| Covariates |                              |            |                              |            |                              |            |                              |            |
| Age        | -0.08 (0.04)                 | .0285      | 0.01 (0.02)                  | .7805      | 5.67 (2.38)                  | .0198      | 2.88 (0.61)                  | <.0001     |

|                |              |       |              |       |                  |       |                |       |
|----------------|--------------|-------|--------------|-------|------------------|-------|----------------|-------|
| Smoke          | -0.22 (0.98) | .8237 | 0.01 (0.67)  | .9846 | 94.84 (65.56)    | .152  | 8.91 (16.74)   | .5963 |
| Hypertension   | 4.78 (1.42)  | .0012 | 2.48 (0.97)  | .0126 | -41.14 (94.85)   | .6657 | -20.60 (24.22) | .3978 |
| Contraceptives | 0.26 (1.86)  | .8896 | -0.22 (1.27) | .8606 | -200.79 (124.34) | .1104 | -36.64 (31.76) | .2521 |
| AHT            | 5.14 (2.63)  | .0544 | 2.76 (1.80)  | .1298 | -144.71 (76.10)  | .4137 | -51.18 (44.98) | .2586 |

244 *Notes.* SE: standard error. AHT: Anti-hypercholesterolemic therapy. N = 84. Differences are  
 245 considered statistically significant at  $p < .05$ .

246

247 In men (Table 2B), the analysis unmasked a statistically detectable association between age and  
 248 ceramide (d18:1/24:1) ( $\beta$  (SE) = 1.86 (.77);  $p = .0179$ ).

249 **Table 2B.** Multivariable linear regression analysis to assess the association between individual  
 250 ceramide species and variables (age, smoke, hypertension, contraceptive use, anti-hypercholesterolemic  
 251 therapy) among men.

|              | Ceramide<br>(d18:1/16:0)     |            | Ceramide<br>(d18:1/18:0)     |            | Ceramide<br>(d18:1/24:0)  |            | Ceramide<br>(d18:1/24:1)     |            |
|--------------|------------------------------|------------|------------------------------|------------|---------------------------|------------|------------------------------|------------|
|              | $\beta$ -coefficient<br>(SE) | $p$ -value | $\beta$ -coefficient<br>(SE) | $p$ -value | $\beta$ -coefficient (SE) | $p$ -value | $\beta$ -coefficient<br>(SE) | $p$ -value |
| Covariates   |                              |            |                              |            |                           |            |                              |            |
| Age          | -0.05 (0.03)                 | .1797      | -0.03 (0.03)                 | .3624      | 2.37 (2.50)               | .3456      | 1.86 (0.77)                  | .0179      |
| Smoke        | -0.74 (1.14)                 | .5199      | 0.25 (0.99)                  | .7989      | -1.46 (82.89)             | .986       | 18.25 (25.46)                | .4758      |
| Hypertension | 0.77 (1.35)                  | .5685      | 2.13 (1.14)                  | .0659      | 132.70 (97.13)            | .176       | 42.58 (29.80)                | .1573      |
| AHT          | -2.08 (1.75)                 | .2388      | -0.79 (1.52)                 | .6064      | -189.47 (128.14)          | .1435      | -77.42 (39.38)               | .053       |

252 *Notes.* SE: standard error. AHT: Anti-hypercholesterolemic therapy. N = 80. Differences are  
 253 considered statistically significant at  $p < .05$ .

254

255 Interestingly, the analysis also pointed to a significant association, found only in women, between  
256 hypertension and ceramide (d18:1/16:0) ( $\beta$  (SE) = 4.78 (1.42);  $p = .0012$ ) and (d18:1/18:0) ( $\beta$  (SE) =  
257 2.48 (.97);  $p = .0126$ ) (Table 2A). Of note, 15 out of 16 women affected by hypertension were in the  
258 post-menopausal group. Finally, we found no associations, in either sex, between ceramide levels and  
259 any other variable, including smoking, contraceptive use or anti-hypercholesterolemic agents, obesity  
260 and diabetes (Table 2A-B).

### 261 **Plasma ceramide levels are negatively correlated with estradiol in women, but not in men**

262 Next, we investigated a possible correlation between plasma levels of estradiol, which are known to fall  
263 significantly at menopause, and ceramides. Estradiol was measured with a competitive binding  
264 immunoassay. As expected, plasma estradiol was higher in pre-menopausal women (<55 years)  
265 compared to men of the same age ( $p < .001$ , 2-way ANOVA followed by Bonferroni post-hoc test) (Fig  
266 3B). After menopause, estradiol levels sharply decreased in both sexes (Fig 3B). Fig 4 illustrates the  
267 results of Pearson's analyses of ceramide levels in female subjects of all ages. The results show a  
268 statistically significant negative correlation between estradiol and ceramide (d18:1/24:1) ( $r = -0.294$ ;  $p$   
269 = .007), a non-significant negative trend between estradiol and ceramide (d18:1/24:0) ( $r = -0.202$ ;  $p =$   
270 .066) and no correlations between estradiol and other ceramide species.

271

272 **Fig 4.** Pearson's correlation analysis between estradiol and levels of various ceramide species in  
273 plasma from 84 women aged 20 to 78 years.

274 (A) Ceramide (d18:1/24:1); (B) Ceramide (d18:1/24:0); (C) Ceramide (d18:1/16:0); (D) Ceramide  
275 (d18:1/18:0). Correlation is considered statistically significant at  $p < .05$ .

276

277 By contrast, in men, no correlation was observed between estradiol and any ceramide species,  
278 including ceramide (d18:1/24:1) ( $r = -0.034$ ;  $p = .763$ ) (Fig 5), which was found to be correlated with  
279 aging ( $\beta$  (SE) = 1.86 (.77);  $p = .0179$ ) (Table 2B).

280

281 **Fig 5.** Pearson's correlation analysis between estradiol and level of various ceramide species in plasma  
282 from 80 men aged 19 to 80 years.

283 (A) Ceramide (d18:1/24:1); (B) Ceramide (d18:1/24:0); (C) Ceramide (d18:1/16:0); (D) Ceramide  
284 (d18:1/18:0). Correlation is considered statistically significant at  $p < .05$ .

285

### 286 **Estradiol suppresses ceramide accumulation *in vitro***

287 Sphingolipid-derived mediators regulate steroidogenesis [32], but it is still unknown whether estrogen  
288 hormones influence sphingolipid metabolism. To gain insight into the causality of the negative  
289 correlation observed between estradiol and ceramide in women, we asked whether the sex hormone  
290 might regulate ceramide mobilization (i.e. formation and/or degradation) in human MCF7 breast cancer  
291 cells, a cell line that expresses the estrogen receptor  $\alpha$  (ER $\alpha$ ) and  $\beta$  (ER $\beta$ ) [31]. MCF7 cells were  
292 treated with estradiol (10 nM) for 24 h and ceramides quantified in lipid extracts by LC-MS/MS.  
293 Results indicate that the exposure to estradiol causes a substantial reduction in ceramide (d18:1/16:0) ( $p$   
294 = .02, unpaired Student's  $t$ -test), (d18:1/24:0) ( $p = .0002$ ) and (d18:1/24:1) ( $p = .0006$ ) (Table 3),  
295 thereby suggesting that estradiol causes a downward regulation in the mobilization of these ceramides.

296

297 **Table 3.** Effects of estradiol on ceramide levels in MCF7 human breast cancer cells. Cells were treated  
298 for 24 h with vehicle (0.1% DMSO in phenol-free DMEM) or 17- $\beta$ -estradiol (10 nM) and ceramide  
299 levels were measured by LC-MS/MS.



|              | Vehicle           | Estradiol         | <i>p</i> -value |
|--------------|-------------------|-------------------|-----------------|
| Ceramide     | (pmol/mg protein) | (pmol/mg protein) |                 |
| (d18:1/16:0) | 57.4 ± 6.2        | 41.8 ± 0.8        | .02             |
| (d18:1/18:0) | 16.9 ± 1.3        | 13.3 ± 1.6        | .12             |
| (d18:1/24:0) | 209.4 ± 14.1      | 134.6 ± 7.4       | .0002           |
| (d18:1/24:1) | 265.6 ± 13.4      | 184.6 ± 12.6      | .0006           |

## 301 **DISCUSSION**

302 In the present study, we investigated the age- and sex-dependent trajectories of plasma ceramides in 80  
303 men and 84 women aged 19-80 years. The subjects were not affected by any major illness or medical  
304 condition known to be linked to alterations in circulating ceramide levels. The results show that, in  
305 women, plasma levels of two ceramide species – (d18:1/24:0) and (d18:1/24:1) – increased with age,  
306 and that this change cannot be ascribed to confounding factors such as obesity, diabetes, hypertension,  
307 tobacco smoking or ongoing anti-cholesterol and contraceptive therapy. In men, the analysis revealed a  
308 statistically detectable association between age and ceramide (d18:1/24:1). Further analyses identified a  
309 significant negative correlation between circulating levels of estradiol and ceramide (d18:1/24:1) in  
310 women of all ages, but not in men. Finally, *in vitro* experiments in a human cell line expressing  
311 estrogen ER- $\alpha$  and ER- $\beta$  receptors showed that treatment with exogenous estradiol produced a  
312 significant decrease in ceramide accumulation. These findings suggest that aging is accompanied, in  
313 humans, by an increase in the plasma concentrations of two ceramide species, (d18:1/24:0) and  
314 (d18:1/24:1), which are also known to be elevated in age-dependent pathologies, such as  
315 atherosclerosis and cardiovascular disease [33,34]. The results also point to the intriguing possibility  
316 that estradiol might control circulating ceramide levels in a sexually dimorphic manner.

317 Previous studies have reported sex-dependent differences in plasma ceramides, but with somewhat  
318 contrasting results. In a small investigation of blood serum samples from 10 Caucasian volunteers (5  
319 males aged 27-33 years and 5 females aged 26-33 years), ceramide (42:1) was found to be higher in  
320 women compared to men [16]. Another study, performed on a much larger cohort of young Mexican  
321 Americans (1,076 individuals, 39.1% males, median age 35.7 years) [17], uncovered an association  
322 between plasma ceramides and sex after adjusting for age and body mass index: ceramide levels were  
323 lower in women than in men. These disparities were mostly driven by long-chain ceramide species,  
324 such as (d18:1/22:0), (d18:1/24:0) and (d18:1/24:1). Finally, in a multiethnic population sample of 366

325 women and 626 men aged over 55 years, enrolled in the Baltimore Longitudinal Study of Aging,  
326 plasma ceramide concentrations were found to be higher in women compared to men [18].  
327 These studies did not focus on age as a variable. By contrast, in the present work we set out to address  
328 the impact of aging on ceramide levels and excluded subjects with disease conditions that had been  
329 previously shown to affect ceramides, such as diabetes [35], cancer [36], renal disease [37],  
330 cardiovascular disease [38], and obesity [39]. We did not exclude subjects with hypertension, however,  
331 because the association of this disease state with altered ceramides remains to be fully established  
332 [11,18]. In our sample, we were able to confirm the presence of age- and sex-dependent differences in  
333 the plasma concentrations of certain ceramide species, but not others. A multivariable analysis showed  
334 that, in women, aging is accompanied by increased levels of ceramide (d18:1/24:0) and (d18:1/24:1). In  
335 men, the analysis also unmasked a statistically detectable association between age and ceramide  
336 (d18:1/24:1). These age-dependent changes could not be ascribed to obesity, diabetes, tobacco cigarette  
337 smoking and use of anti-hypercholesterolemic or contraceptive agents. Interestingly, secondary data  
338 analyses found that ceramide levels were significantly lower in female than male subjects aged 20-54, a  
339 difference that disappeared after menopause. In their 2015 study, Mielke and collaborators did not  
340 specifically include menopause as a variable but suggested that menopause and estradiol may influence  
341 ceramide levels [18]. Two sets of results presented here support this prediction. First, we showed that,  
342 in women of all ages, plasma estradiol was negatively correlated with ceramide (d18:1/24:1) and  
343 displayed a trend toward correlation with ceramide (d18:1/24:0). No such relationship was detectable in  
344 men. Second, we found that incubation with exogenous estradiol (10 nM) lowered the levels of various  
345 ceramides, including ceramide (d18:1/24:0) and (d18:1/24:1), in human estrogen-sensitive MCF7 cells.  
346 The findings outlined above suggest that age-dependent changes in estradiol may affect ceramide  
347 metabolism differentially in men and women. The correlation between estradiol and ceramide raises the  
348 possibility that changes in the availability of certain ceramide species [e.g. ceramide (d18:1/24:1)]

349 might be implicated in the reported cardioprotective, antihypertensive and neuroprotective effects of  
350 estradiol [40-42]. In this context, it is important to point out that increased ceramide levels have been  
351 consistently linked to heightened risk of myocardial infarction and stroke [43]. Moreover, recent  
352 evidence indicates that alterations of ceramide levels may mirror, indirectly, ongoing  
353 neurodegenerative processes and might be used as a biomarker for Alzheimer's disease development  
354 and progression [44]. Interestingly, the close association between alterations in ceramide levels and the  
355 likelihood of developing cognitive impairment and Alzheimer-related pathology may be particularly  
356 strong in women, thereby indicating that sex-related mechanisms might participate in shaping the  
357 Alzheimer phenotype. Of note, elderly women show changes in plasma ceramide levels at the onset of  
358 their memory impairment [15]. In the past few years, the neurobiology of memory disorders has  
359 received increasing attention [45]. Memory deficits are often reported by women in temporal proximity  
360 of menopause [46], and recent findings indicate distinct changes in memory processing that appear to  
361 be linked more to the premenopausal status than to chronological aging: in peri-menopausal women,  
362 the onset and progression of cognitive decline are often associated with a menopause-related decrease  
363 in estradiol levels [47]. Thus, the interplay between estradiol and ceramides, described here, may  
364 potentially be of broad significance for a variety of age-dependent disorders, including cardiovascular  
365 disease and cognitive impairment or any intersection of the two conditions [48].

366 The present study has several limitations. First, even though we excluded persons affected by obesity  
367 and diabetes, we did not collect information on metabolic factors that could potentially impact  
368 ceramide mobilization – such as adiposity, physical activity and levels of cholesterol and glucose in  
369 blood [18,49-51]. Second, our study was focused on a specific subset of ceramides that we had  
370 previously found to be altered in the hippocampus of aged male and female mice [19]. This group of  
371 ceramides has been proposed as potential biomarker for cardiovascular risk [52], but is still only a  
372 small fraction of the vast number of ceramides produced by the body. Third, we measured total

373 circulating levels of ceramides and did not attempt to separate ceramide pools bound to specific plasma  
374 lipoproteins [53]. Because the distribution of ceramides among lipoproteins may change with obesity  
375 and diabetes [50], it is possible that aging might exert a similar effect.

376 Our findings also raise a number of relevant questions, which should be addressed in future work. First,  
377 even though the results suggest that estradiol modulates ceramide mobilization in women, the precise  
378 mechanism and functional significance of this effect remain to be determined. One possibility is that  
379 activation of estrogen receptors results in the down-regulation of *de novo* ceramide biosynthesis, for  
380 example by suppressing the expression of key enzymes such as serine-palmitoyltransferase and  
381 ceramide synthase [54]. Alternatively, estradiol might stimulate the expression of ceramide-  
382 hydrolyzing enzymes such as acid or neutral ceramidase. Probing the link between estradiol and  
383 ceramides will require additional experimentation, which may include measuring circulating ceramide  
384 levels in women throughout the menstrual cycle or assessing the impact of endogenous and exogenous  
385 estradiol on sphingolipid metabolism in female animals. At the functional level, studies are needed to  
386 correlate ceramide and estrogen levels to a broad panel of biomarkers (e.g., lipoprotein profile, C-  
387 reactive protein) and clinical outcome measures (e.g., future adverse cardiovascular events and  
388 cognitive impairment) [52]. Without such information, the clinical significance of our findings remains  
389 speculative. Second, the lack of correlation between estradiol and ceramide (d18:1/18:0) and lack of  
390 association with age implies that this ceramide species, though elevated after menopause, may be  
391 subjected to a different regulation than ceramide (d18:1/24:1), whose levels are correlated with  
392 estradiol and are statistically associated with age. Third, we observed a substantial age-dependent  
393 decrease in plasma dihydroceramide (d18:0/24:0) in men aged 54-80 years. The significance of this  
394 finding is presently unclear, but warrants further attention. Fourth, we unexpectedly uncovered an  
395 association between hypertension in post-menopausal women and elevated levels of ceramide  
396 (d18:1/16:0) and (d18:1/18:0). While this result is consistent with previous reports [11], caution is

397 warranted until studies with a larger cohort of pre- and post-menopausal women are performed. Finally,  
398 as mentioned above, the relation between ceramide levels and premorbid changes in cardiovascular,  
399 metabolic or cognitive function was not investigated in our study and deserves further investigations.  
400 Despite these unanswered questions, our results reveal the existence of a link between age, estradiol,  
401 and ceramides, which might contribute to age-dependent pathologies in post-menopausal women.  
402

403 **REFERENCES**

- 404 1. Castro BM, Prieto M, Silva LC (2014) Ceramide: a simple sphingolipid with unique biophysical  
405 properties. *Prog Lipid Res* 54: 53-67.
- 406 2. Grassme H, Riethmuller J, Gulbins E (2007) Biological aspects of ceramide-enriched membrane  
407 domains. *Prog Lipid Res* 46: 161-170.
- 408 3. Garcia-Barros M, Coant N, Kawamori T, Wada M, Snider AJ, et al. (2016) Role of neutral  
409 ceramidase in colon cancer. *FASEB J* 30: 4159-4171.
- 410 4. Saddoughi SA, Ogretmen B (2013) Diverse functions of ceramide in cancer cell death and  
411 proliferation. *Adv Cancer Res* 117: 37-58.
- 412 5. Bieberich E (2012) Ceramide and sphingosine-1-phosphate signaling in embryonic stem cell  
413 differentiation. *Methods Mol Biol* 874: 177-192.
- 414 6. Venable ME, Lee JY, Smyth MJ, Bielawska A, Obeid LM (1995) Role of ceramide in cellular  
415 senescence. *J Biol Chem* 270: 30701-30708.
- 416 7. Morad SA, Cabot MC (2013) Ceramide-orchestrated signalling in cancer cells. *Nat Rev Cancer* 13:  
417 51-65.
- 418 8. Maeng HJ, Song JH, Kim GT, Song YJ, Lee K, et al. (2017) Celecoxib-mediated activation of  
419 endoplasmic reticulum stress induces de novo ceramide biosynthesis and apoptosis in hepatoma HepG2  
420 cells mobilization. *BMB Rep* 50: 144-149.
- 421 9. Samad F, Hester KD, Yang G, Hannun YA, Bielawski J (2006) Altered adipose and plasma  
422 sphingolipid metabolism in obesity: a potential mechanism for cardiovascular and metabolic risk.  
423 *Diabetes* 55: 2579-2587.
- 424 10. Haus JM, Kashyap SR, Kasumov T, Zhang R, Kelly KR, et al. (2009) Plasma ceramides are  
425 elevated in obese subjects with type 2 diabetes and correlate with the severity of insulin resistance.  
426 *Diabetes* 58: 337-343.

- 427 11. Spijkers LJ, van den Akker RF, Janssen BJ, Debets JJ, De Mey JG, et al. (2011) Hypertension is  
428 associated with marked alterations in sphingolipid biology: a potential role for ceramide. *PLoS One* 6:  
429 e21817.
- 430 12. Ichi I, Nakahara K, Miyashita Y, Hidaka A, Kutsukake S, et al. (2006) Association of ceramides in  
431 human plasma with risk factors of atherosclerosis. *Lipids* 41: 859-863.
- 432 13. de Mello VD, Lankinen M, Schwab U, Kolehmainen M, Lehto S, et al. (2009) Link between  
433 plasma ceramides, inflammation and insulin resistance: association with serum IL-6 concentration in  
434 patients with coronary heart disease. *Diabetologia* 52: 2612-2615.
- 435 14. Mielke MM, Bandaru VV, Haughey NJ, Rabins PV, Lyketsos CG, et al. (2010) Serum  
436 sphingomyelins and ceramides are early predictors of memory impairment. *Neurobiol Aging* 31: 17-24.
- 437 15. Mielke MM, Haughey NJ, Bandaru VV, Schech S, Carrick R, et al. (2010) Plasma ceramides are  
438 altered in mild cognitive impairment and predict cognitive decline and hippocampal volume loss.  
439 *Alzheimers Dement* 6: 378-385.
- 440 16. Ishikawa M, Tajima Y, Murayama M, Senoo Y, Maekawa K, et al. (2013) Plasma and serum from  
441 nonfasting men and women differ in their lipidomic profiles. *Biol Pharm Bull* 36: 682-685.
- 442 17. Weir JM, Wong G, Barlow CK, Greeve MA, Kowalczyk A, et al. (2013) Plasma lipid profiling in a  
443 large population-based cohort. *J Lipid Res* 54: 2898-2908.
- 444 18. Mielke MM, Bandaru VV, Han D, An Y, Resnick SM, et al. (2015) Demographic and clinical  
445 variables affecting mid- to late-life trajectories of plasma ceramide and dihydroceramide species.  
446 *Aging Cell* 14: 1014-1023.
- 447 19. Vozella V, Basit A, Misto A, Piomelli D (2017) Age-dependent changes in nervonic acid-  
448 containing sphingolipids in mouse hippocampus. *Biochim Biophys Acta* 1862: 1502-1511.



- 449 20. Green CL, Mitchell SE, Deros D, Wang Y, Chen L, et al. (2017) The effects of graded levels of  
450 calorie restriction: IX. Global metabolomic screen reveals modulation of carnitines, sphingolipids and  
451 bile acids in the liver of C57BL/6 mice. *Aging Cell* 16: 529-540.
- 452 21. Folstein MF, Folstein SE, McHugh PR (1975) "Mini-mental state". A practical method for grading  
453 the cognitive state of patients for the clinician. *J Psychiatr Res* 12: 189-198.
- 454 22. Carlesimo GA, Caltagirone C, Gainotti G (1996) The Mental Deterioration Battery: normative data,  
455 diagnostic reliability and qualitative analyses of cognitive impairment. The Group for the  
456 Standardization of the Mental Deterioration Battery. *Eur Neurol* 36: 378-384.
- 457 23. McKhann GM, Knopman DS, Chertkow H, Hyman BT, Jack CR, Jr., et al. (2011) The diagnosis of  
458 dementia due to Alzheimer's disease: recommendations from the National Institute on Aging-  
459 Alzheimer's Association workgroups on diagnostic guidelines for Alzheimer's disease. *Alzheimers*  
460 *Dement* 7: 263-269.
- 461 24. Petersen RC, Morris JC (2005) Mild cognitive impairment as a clinical entity and treatment target.  
462 *Arch Neurol* 62: 1160-1163; discussion 1167.
- 463 25. First MB, Pincus HA (2002) The DSM-IV Text Revision: rationale and potential impact on clinical  
464 practice. *Psychiatr Serv* 53: 288-292.
- 465 26. Mencarelli C, Martinez-Martinez P (2013) Ceramide function in the brain: when a slight tilt is  
466 enough. *Cell Mol Life Sci* 70: 181-203.
- 467 27. Filippov V, Song MA, Zhang K, Vinters HV, Tung S, et al. (2012) Increased ceramide in brains  
468 with Alzheimer's and other neurodegenerative diseases. *J Alzheimers Dis* 29: 537-547.
- 469 28. Iorio M, Spalletta G, Chiapponi C, Luccichenti G, Cacciari C, et al. (2013) White matter  
470 hyperintensities segmentation: a new semi-automated method. *Front Aging Neurosci* 5: 76.
- 471 29. Basit A, Piomelli D, Armirotti A (2015) Rapid evaluation of 25 key sphingolipids and  
472 phosphosphingolipids in human plasma by LC-MS/MS. *Anal Bioanal Chem* 407: 5189-5198.

- 473 30. Soule HD, Vazquez J, Long A, Albert S, Brennan M (1973) A human cell line from a pleural  
474 effusion derived from a breast carcinoma. *J Natl Cancer Inst* 51: 1409-1416.
- 475 31. Brooks SC, Locke ER, Soule HD (1973) Estrogen receptor in a human cell line (MCF-7) from  
476 breast carcinoma. *J Biol Chem* 248: 6251-6253.
- 477 32. Lucki NC, Sewer MB (2010) The interplay between bioactive sphingolipids and steroid hormones.  
478 *Steroids* 75: 390-399.
- 479 33. Pan W, Yu J, Shi R, Yan L, Yang T, et al. (2014) Elevation of ceramide and activation of secretory  
480 acid sphingomyelinase in patients with acute coronary syndromes. *Coron Artery Dis* 25: 230-235.
- 481 34. Yu J, Pan W, Shi R, Yang T, Li Y, et al. (2015) Ceramide is upregulated and associated with  
482 mortality in patients with chronic heart failure. *Can J Cardiol* 31: 357-363.
- 483 35. Galadari S, Rahman A, Pallichankandy S, Galadari A, Thayyullathil F (2013) Role of ceramide in  
484 diabetes mellitus: evidence and mechanisms. *Lipids Health Dis* 12: 98.
- 485 36. Kizhakkayil J, Thayyullathil F, Chathoth S, Hago A, Patel M, et al. (2012) Glutathione regulates  
486 caspase-dependent ceramide production and curcumin-induced apoptosis in human leukemic cells. *Free  
487 Radic Biol Med* 52: 1854-1864.
- 488 37. Mitsnefes M, Scherer PE, Friedman LA, Gordillo R, Furth S, et al. (2014) Ceramides and cardiac  
489 function in children with chronic kidney disease. *Pediatr Nephrol* 29: 415-422.
- 490 38. Alewijnse AE, Peters SL (2008) Sphingolipid signalling in the cardiovascular system: good, bad or  
491 both? *Eur J Pharmacol* 585: 292-302.
- 492 39. Samad F, Badeanlou L, Shah C, Yang G (2011) Adipose tissue and ceramide biosynthesis in the  
493 pathogenesis of obesity. *Adv Exp Med Biol* 721: 67-86.
- 494 40. Lagranha CJ, Silva TLA, Silva SCA, Braz GRF, da Silva AI, et al. (2018) Protective effects of  
495 estrogen against cardiovascular disease mediated via oxidative stress in the brain. *Life Sci* 192: 190-  
496 198.

- 497 41. Hernandez-Fonseca K, Massieu L, Garcia de la Cadena S, Guzman C, Camacho-Arroyo I (2012)  
498 Neuroprotective role of estradiol against neuronal death induced by glucose deprivation in cultured rat  
499 hippocampal neurons. *Neuroendocrinology* 96: 41-50.
- 500 42. Mercurio G, Zoncu S, Piano D, Pilia I, Lao A, et al. (1998) Estradiol-17beta reduces blood pressure  
501 and restores the normal amplitude of the circadian blood pressure rhythm in postmenopausal  
502 hypertension. *Am J Hypertens* 11: 909-913.
- 503 43. Park JY, Lee SH, Shin MJ, Hwang GS (2015) Alteration in metabolic signature and lipid  
504 metabolism in patients with angina pectoris and myocardial infarction. *PLoS One* 10: e0135228.
- 505 44. Mielke MM, Lyketsos CG (2006) Lipids and the pathogenesis of Alzheimer's disease: is there a  
506 link? *Int Rev Psychiatry* 18: 173-186.
- 507 45. Jessen F (2014) Subjective and objective cognitive decline at the pre-dementia stage of Alzheimer's  
508 disease. *Eur Arch Psychiatry Clin Neurosci* 264 Suppl 1: S3-7.
- 509 46. Newhouse P, Dumas J (2015) Estrogen-cholinergic interactions: Implications for cognitive aging.  
510 *Horm Behav* 74: 173-185.
- 511 47. Henderson VW (2010) Action of estrogens in the aging brain: dementia and cognitive aging.  
512 *Biochim Biophys Acta* 1800: 1077-1083.
- 513 48. Toledo JB, Arnold SE, Raible K, Brettschneider J, Xie SX, et al. (2013) Contribution of  
514 cerebrovascular disease in autopsy confirmed neurodegenerative disease cases in the National  
515 Alzheimer's Coordinating Centre. *Brain* 136: 2697-2706.
- 516 49. Fabbri E, Yang A, Simonsick EM, Chia CW, Zoli M, et al. (2016) Circulating ceramides are  
517 inversely associated with cardiorespiratory fitness in participants aged 54-96 years from the Baltimore  
518 Longitudinal Study of Aging. *Aging Cell* 15: 825-831.

- 519 50. Boon J, Hoy AJ, Stark R, Brown RD, Meex RC, et al. (2013) Ceramides contained in LDL are  
520 elevated in type 2 diabetes and promote inflammation and skeletal muscle insulin resistance. *Diabetes*  
521 62: 401-410.
- 522 51. Bergman BC, Brozinick JT, Strauss A, Bacon S, Kerege A, et al. (2015) Serum sphingolipids:  
523 relationships to insulin sensitivity and changes with exercise in humans. *Am J Physiol Endocrinol*  
524 *Metab* 309: E398-408.
- 525 52. Summers SA (2017) Could Ceramides Become the New Cholesterol? *Cell Metab*.
- 526 53. Hammad SM, Pierce JS, Soodavar F, Smith KJ, Al Gadban MM, et al. (2010) Blood  
527 sphingolipidomics in healthy humans: impact of sample collection methodology. *J Lipid Res* 51: 3074-  
528 3087.
- 529 54. Gault CR, Obeid LM, Hannun YA (2010) An overview of sphingolipid metabolism: from synthesis  
530 to breakdown. *Adv Exp Med Biol* 688: 1-23.

531

532

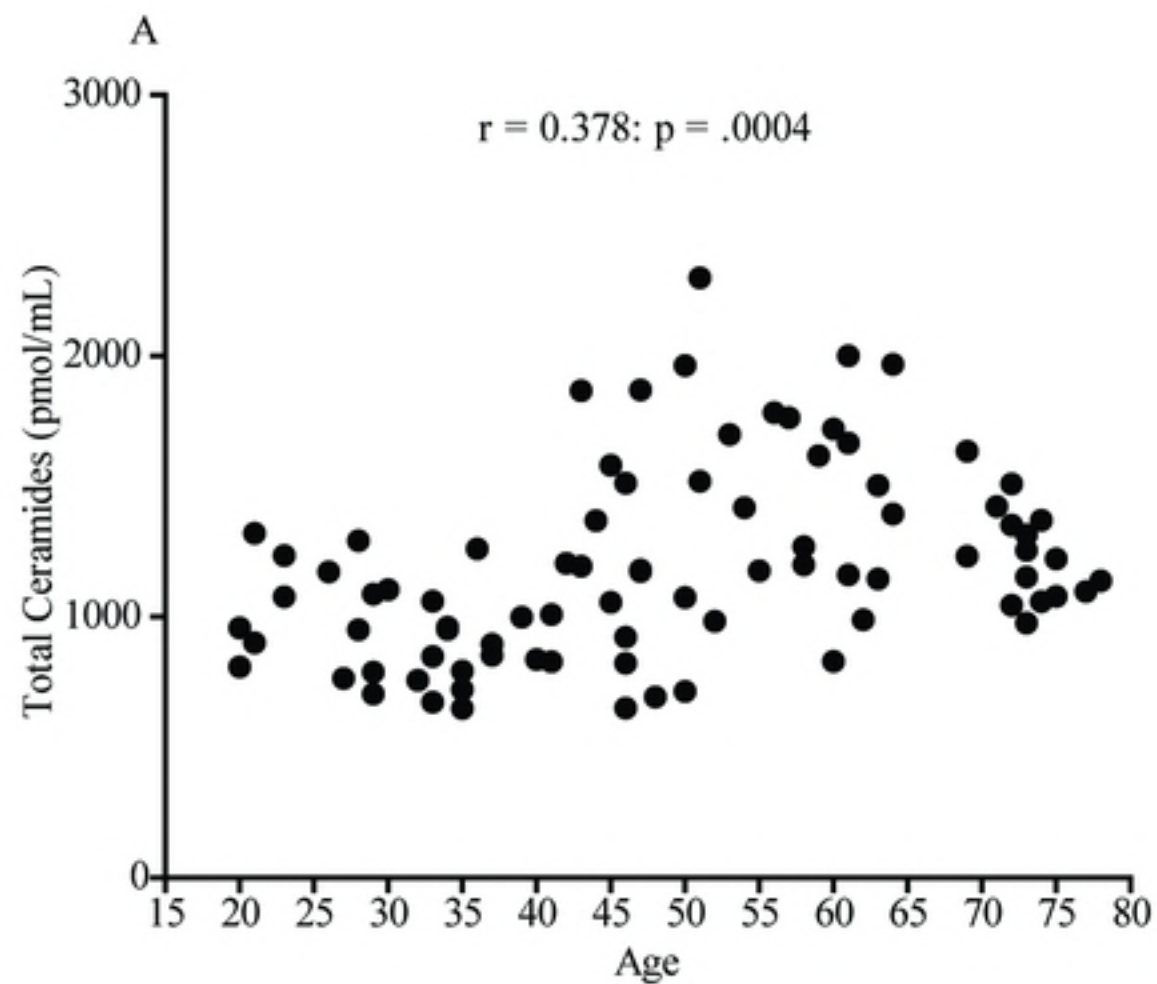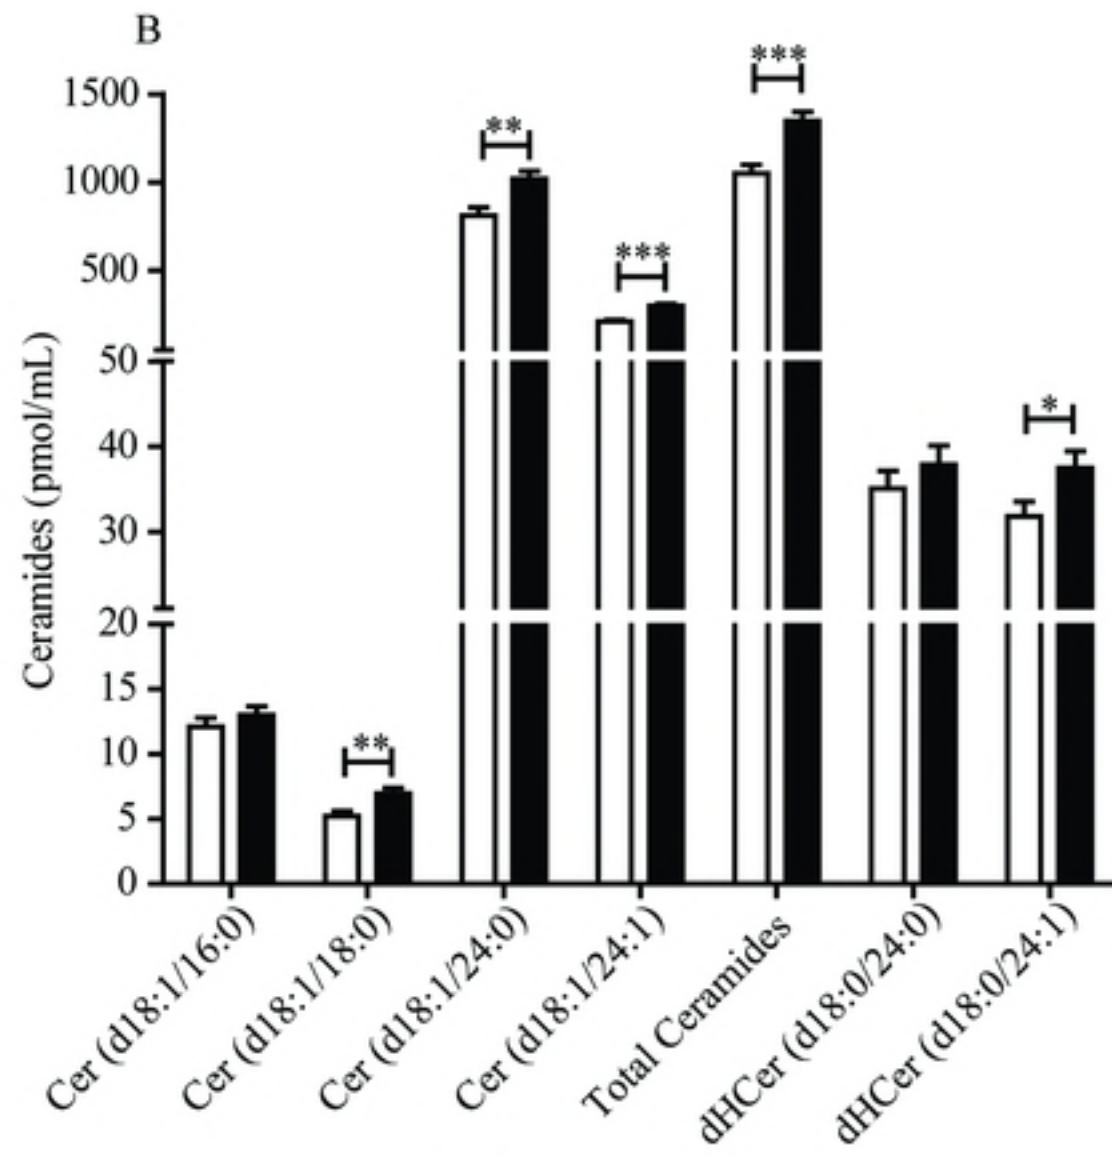

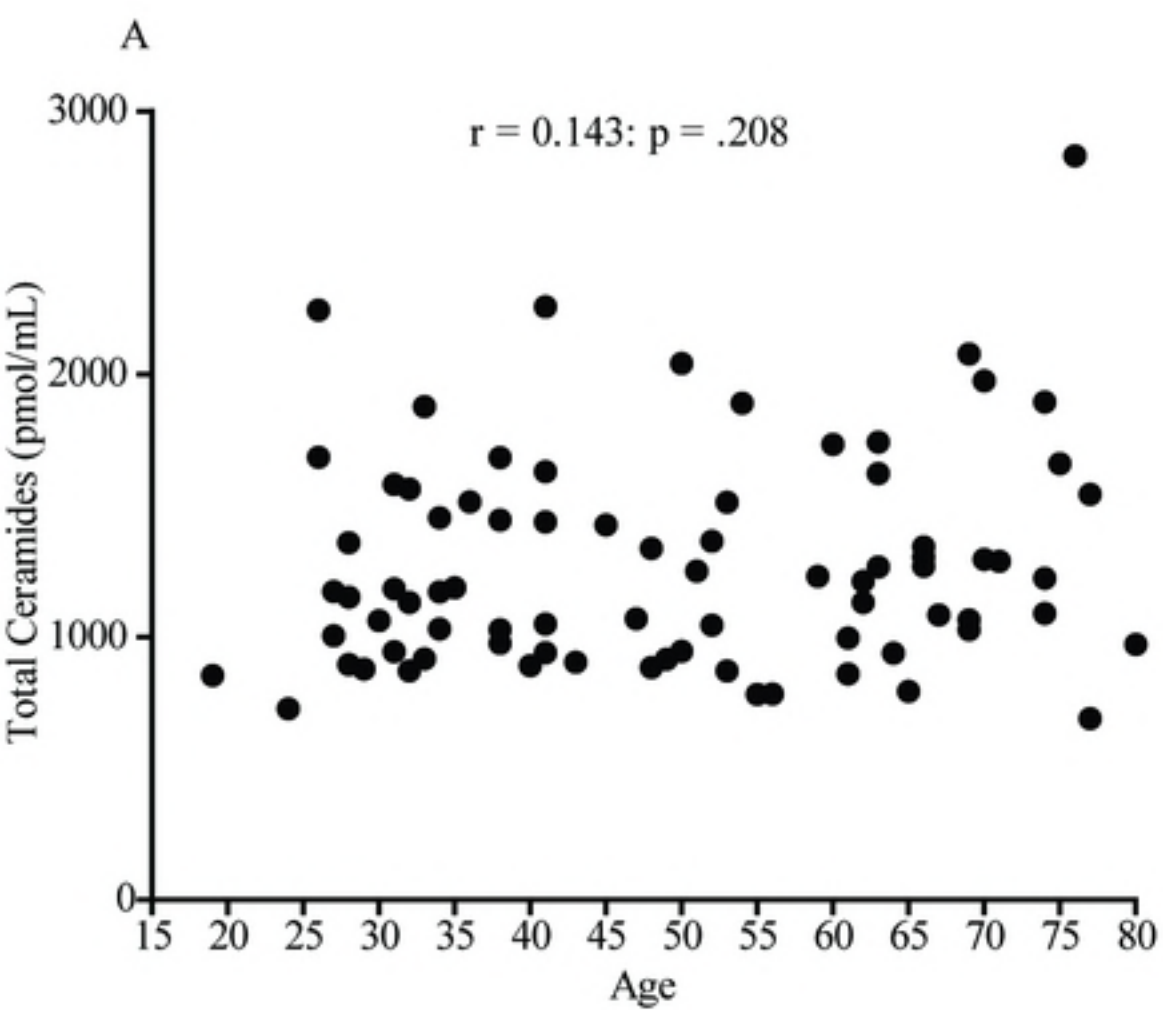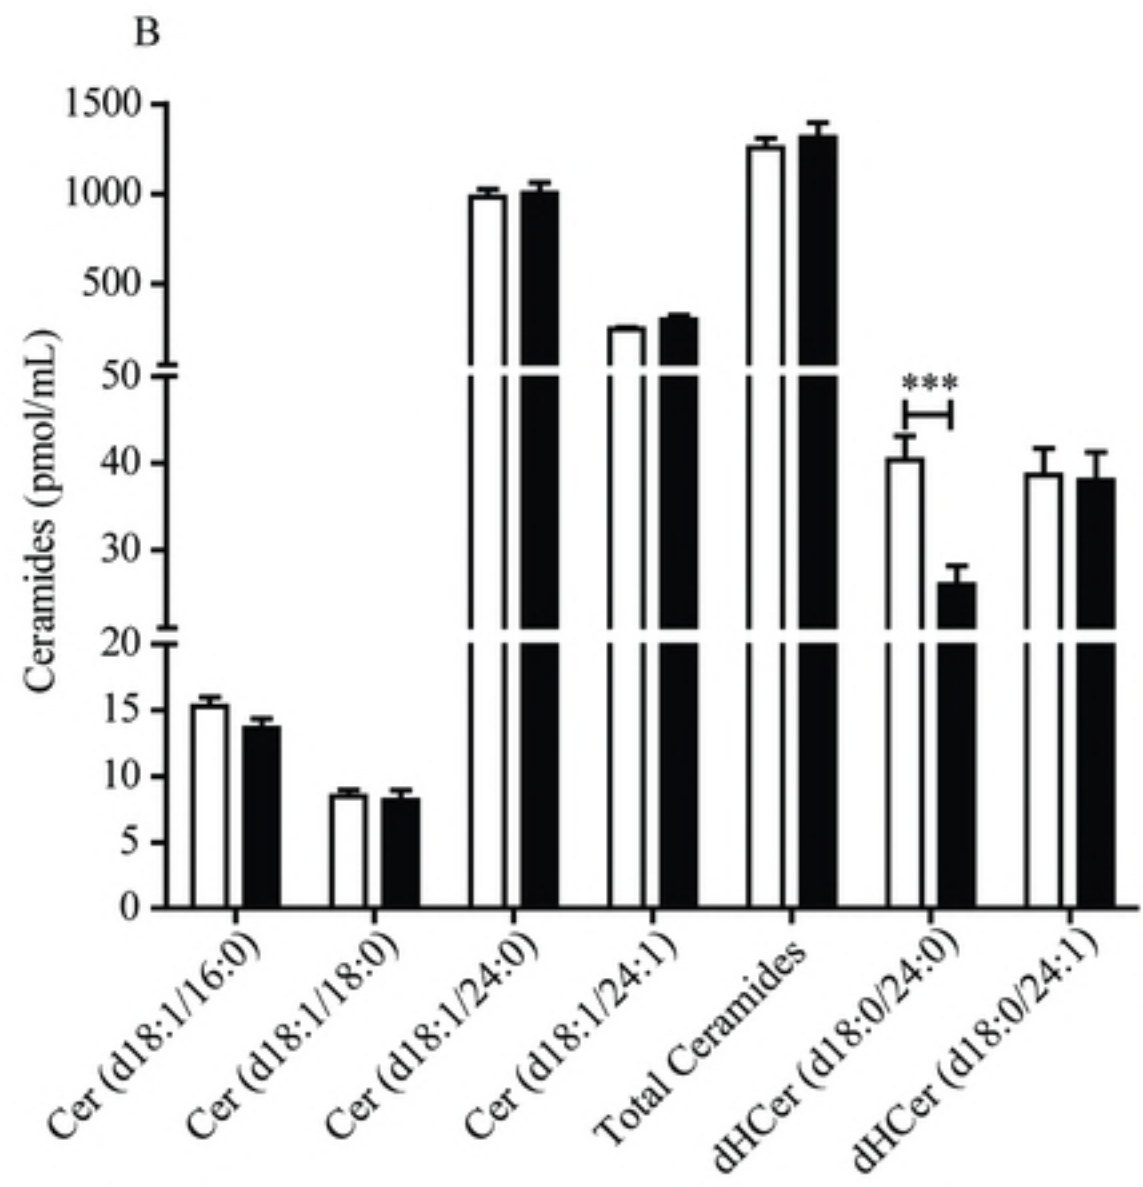

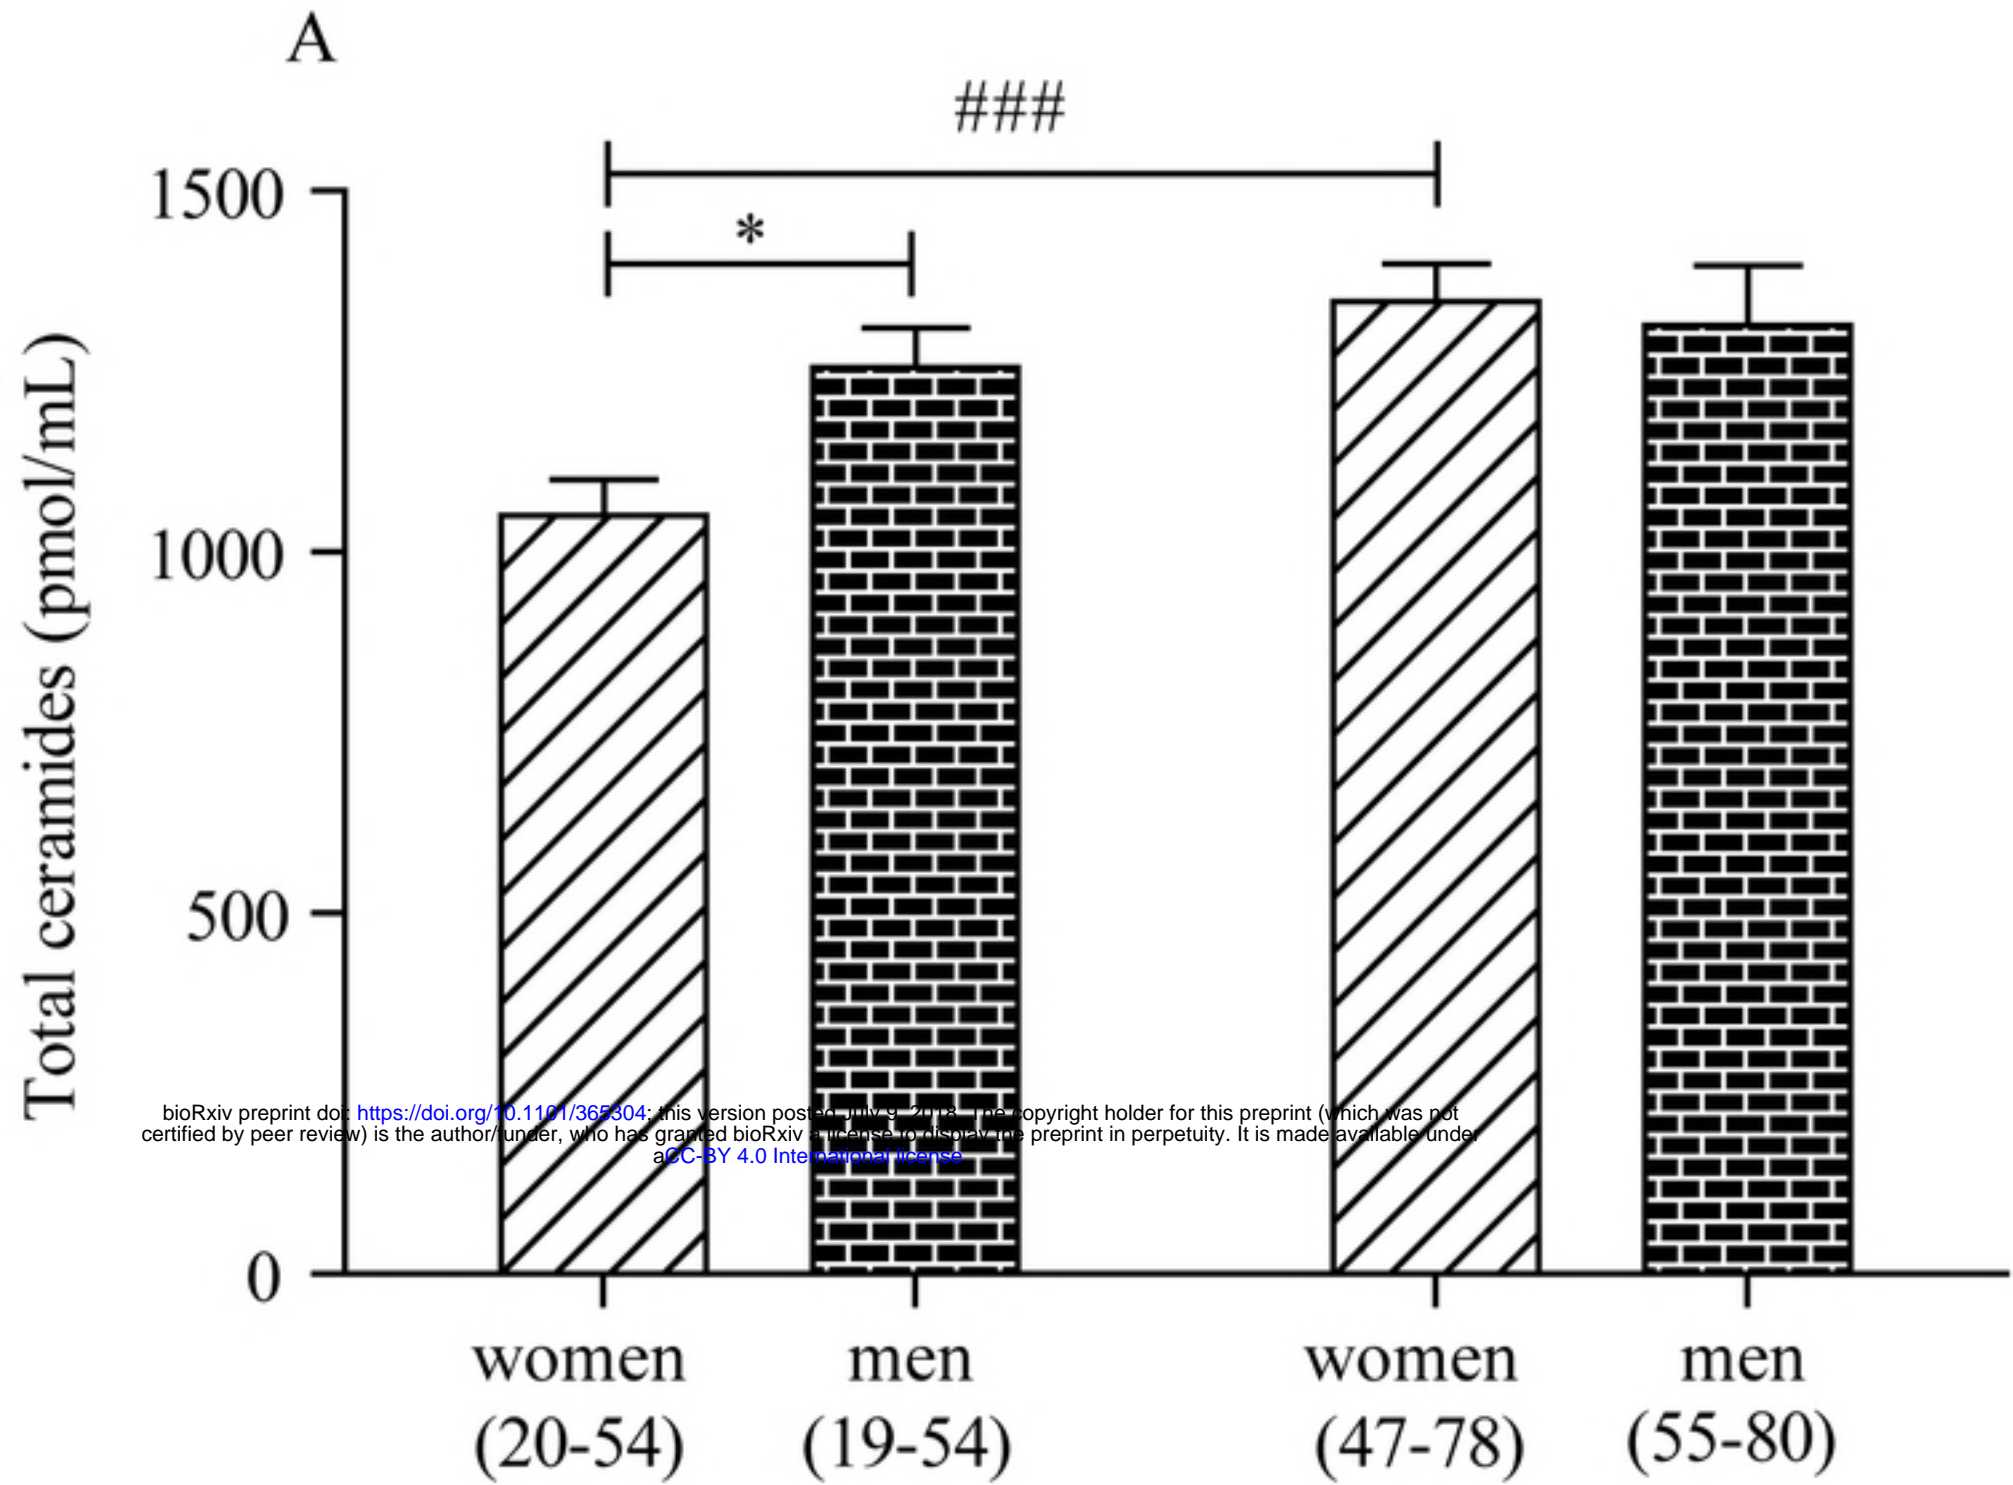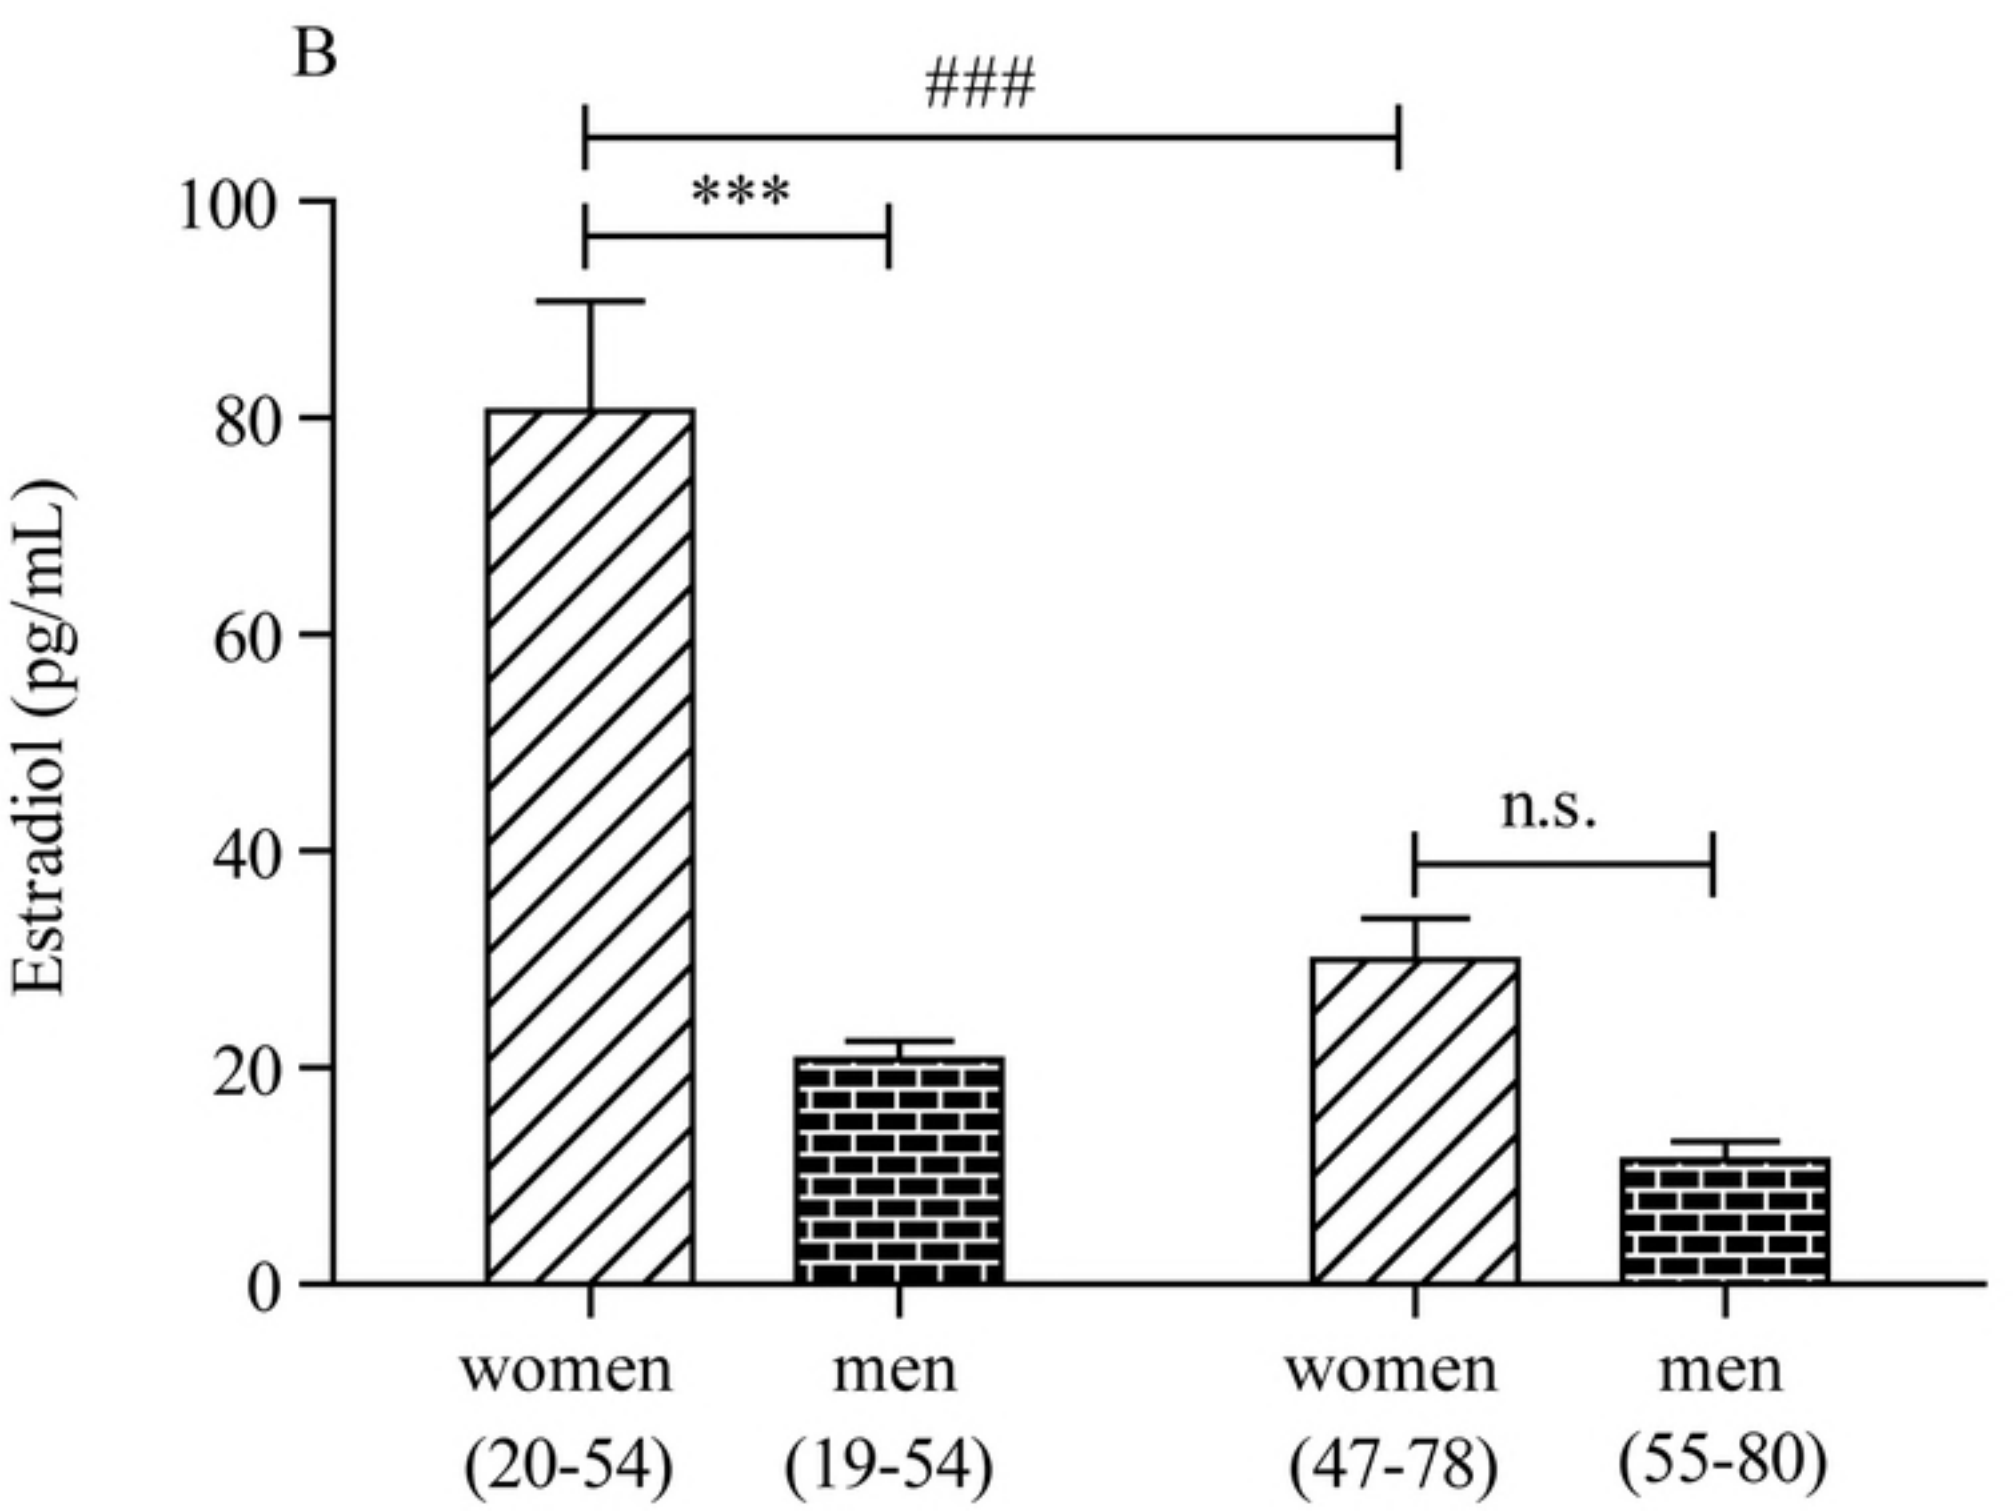

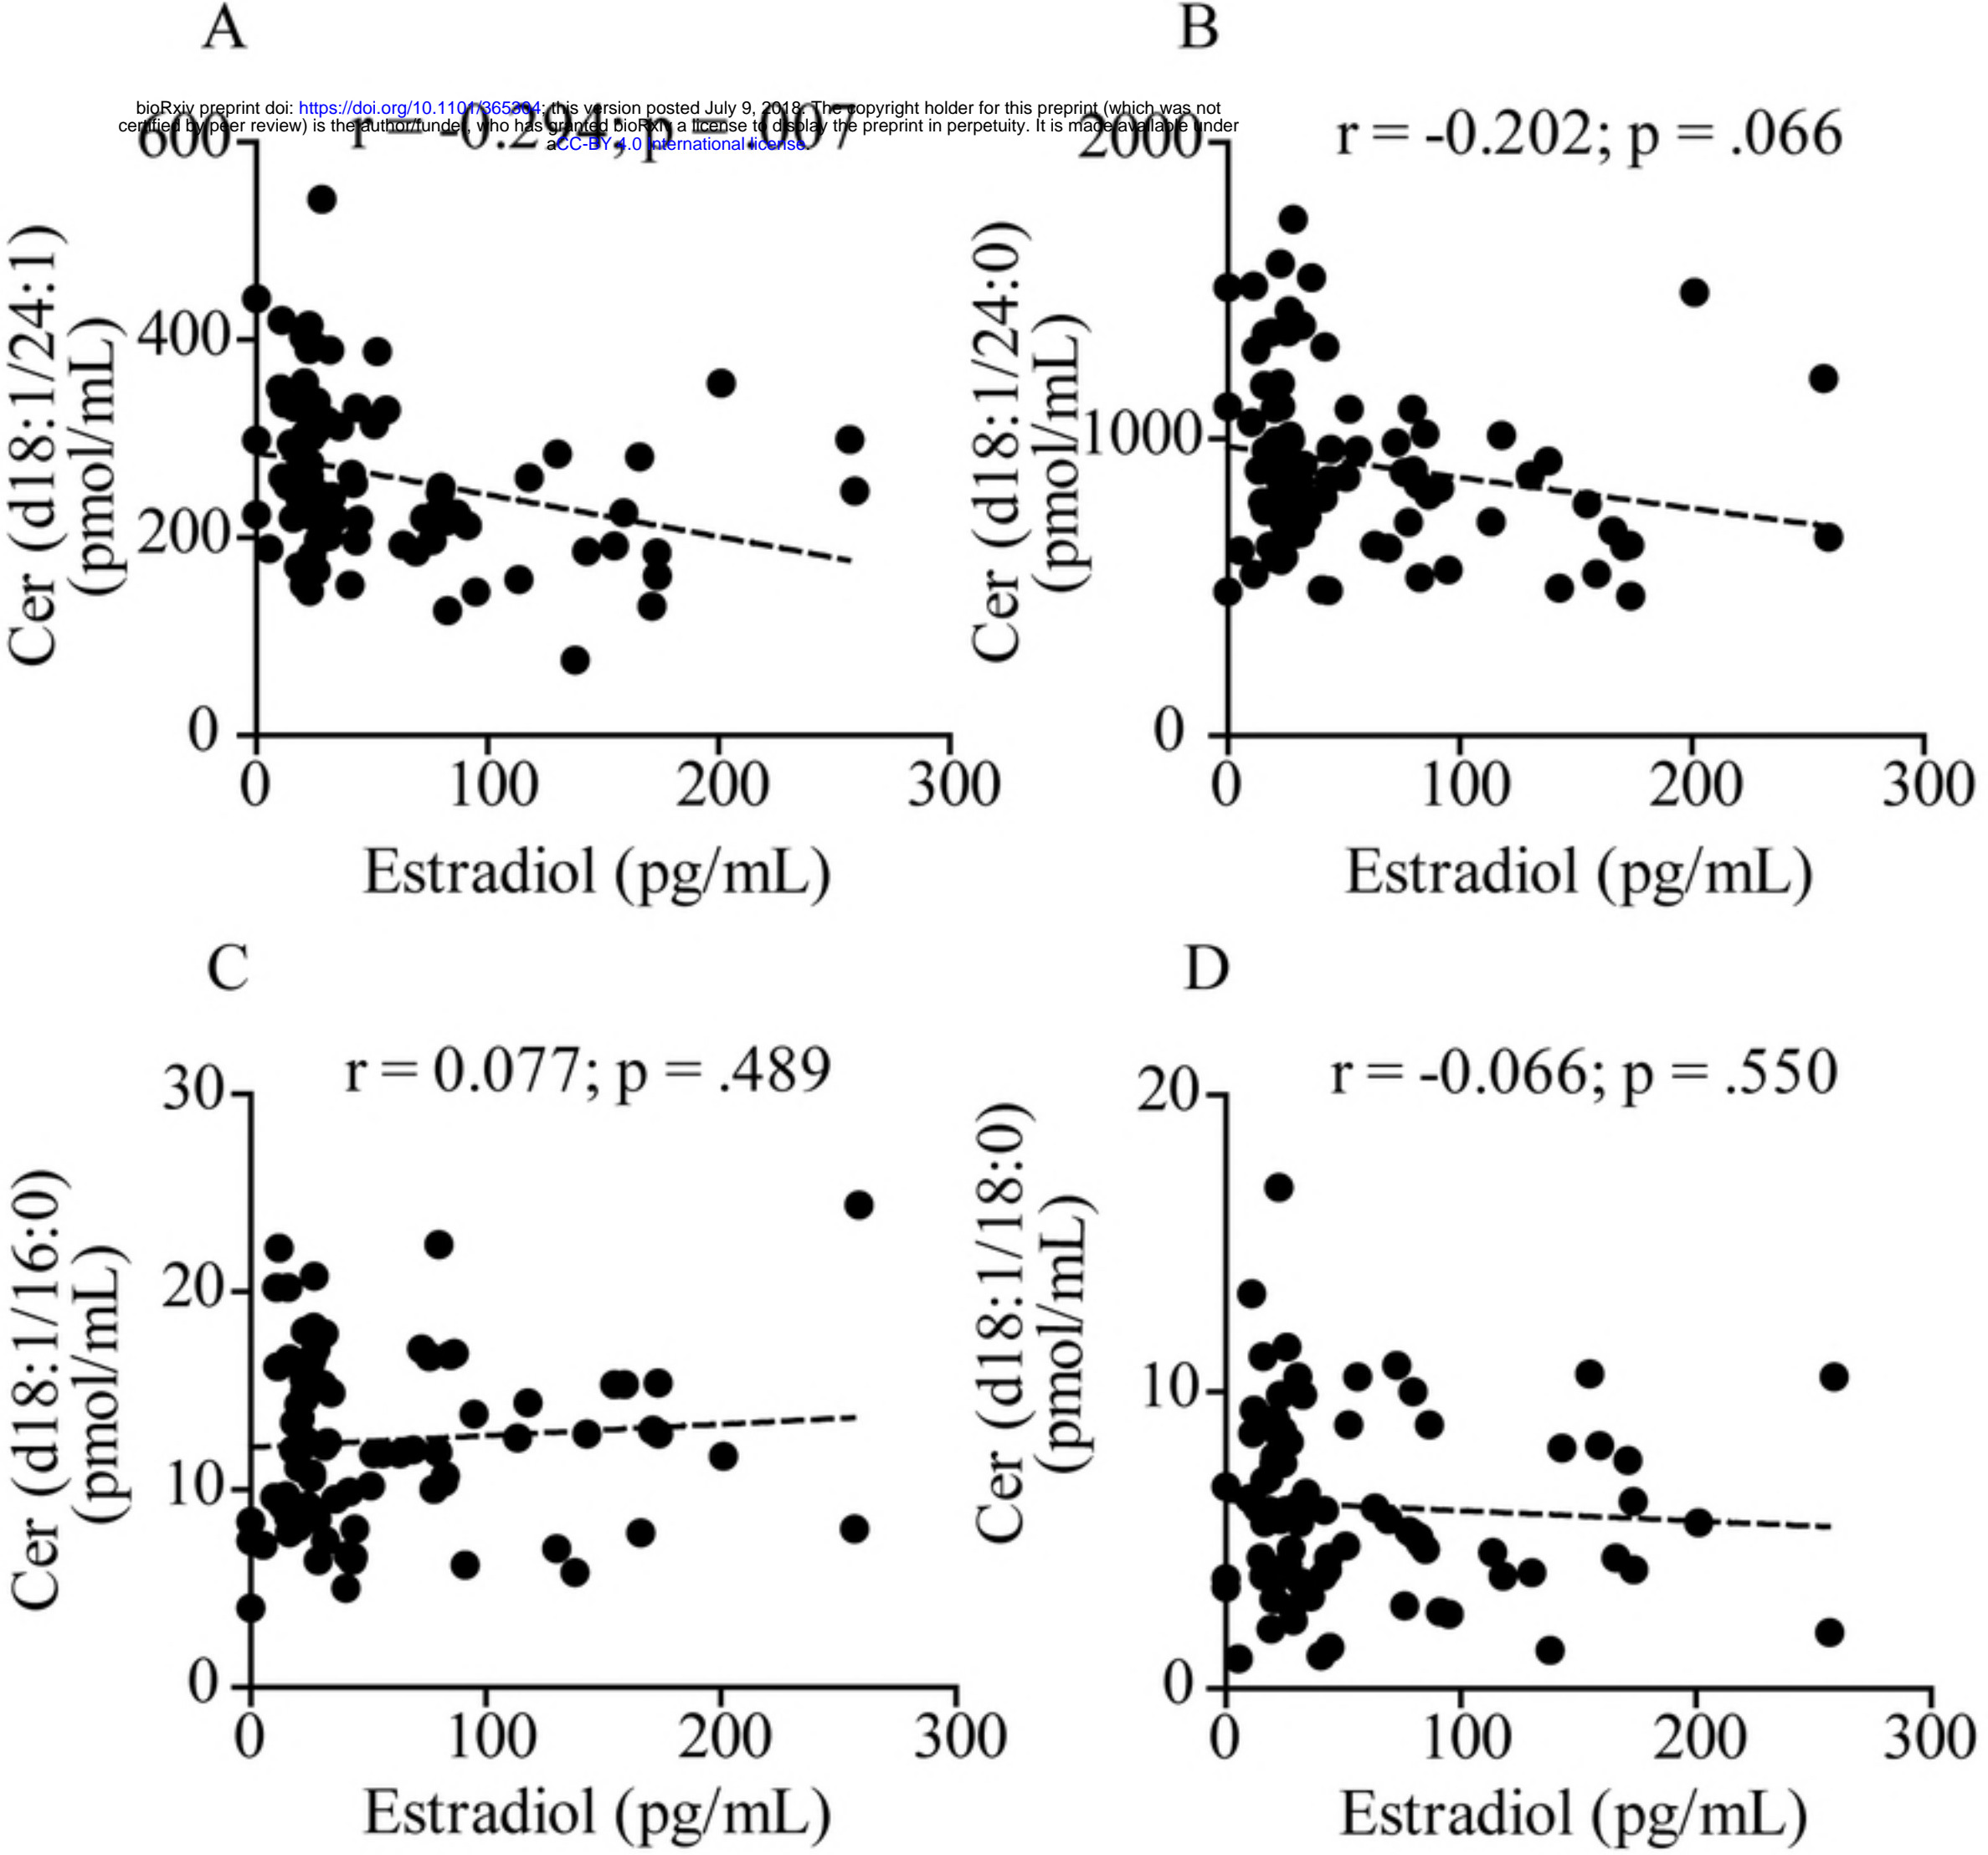



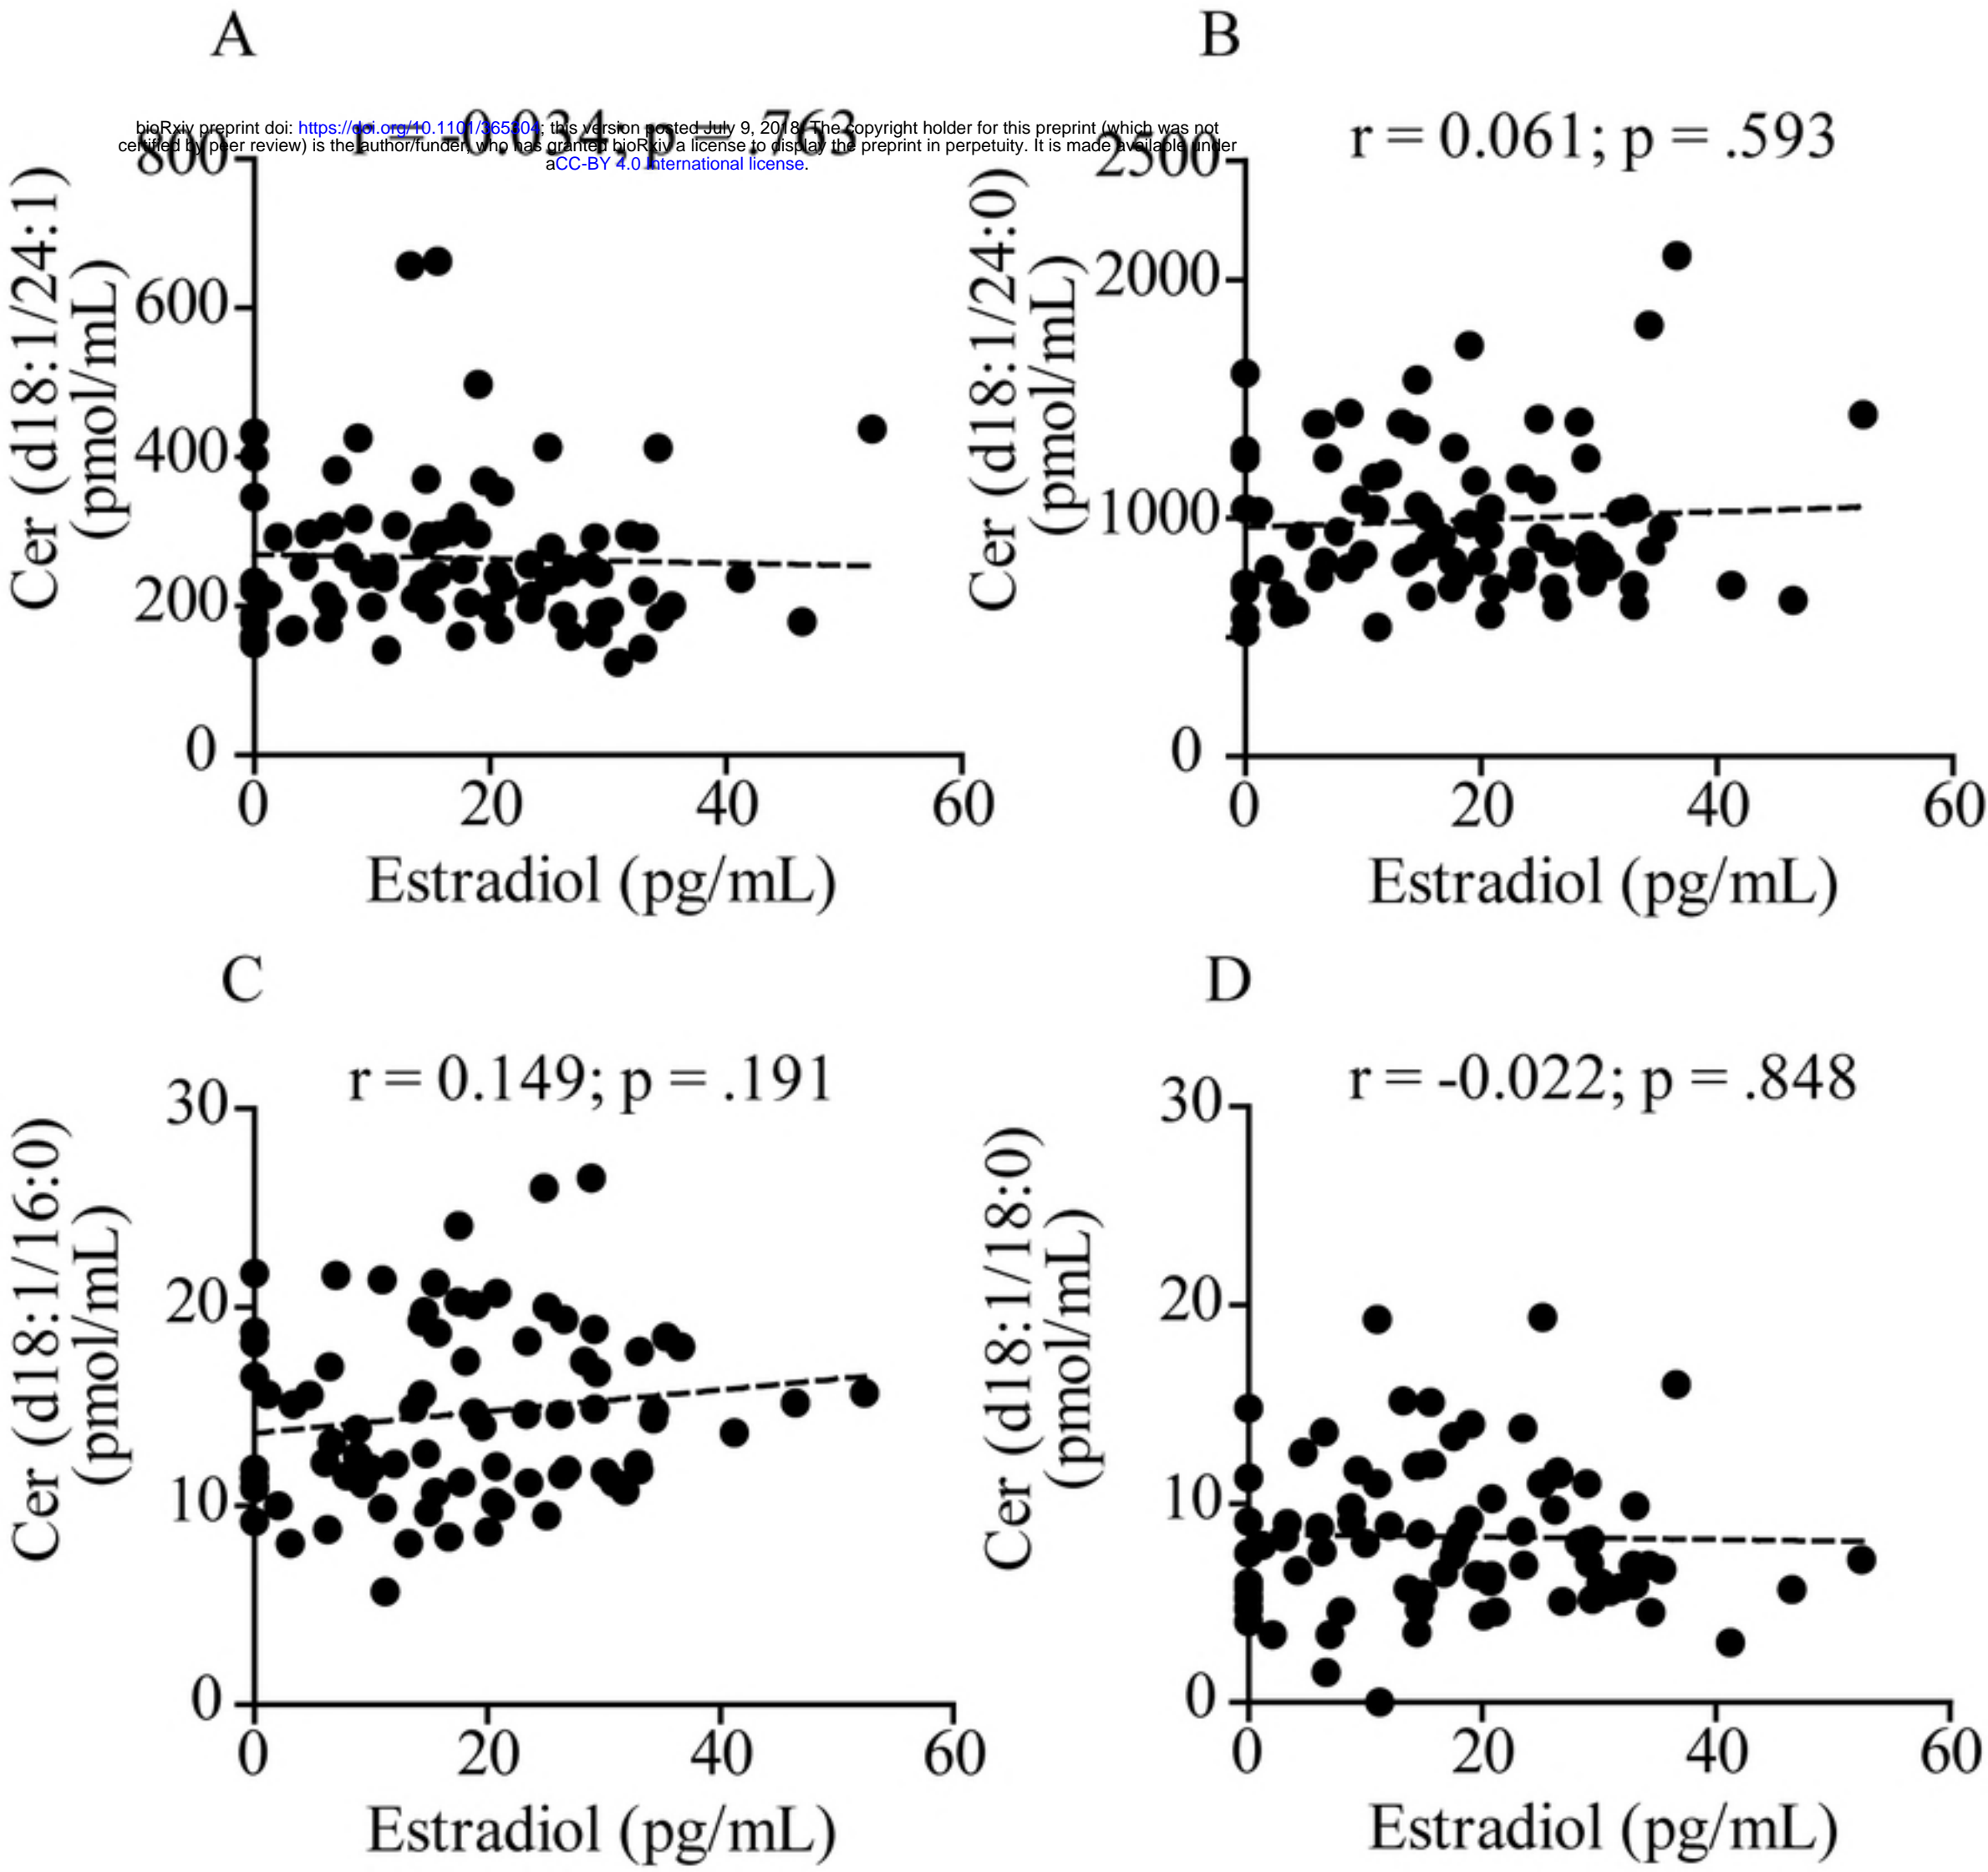

Source: https://www.biorxiv.org/content/10.1101/365304v1.full.pdf
